# Supplementary material for: Hexapod Assassins’ Potion: Venom Composition and Bioactivity from the Eurasian Assassin Bug Rhynocoris iracundus
Source: MDPI journal article supplement (doi:10.3390/biomedicines9070819), 2021-07-14
Supplement: s1 [file s1]

|                | <b>Ri-Kin</b> | <b>Pp-Kin1</b> | <b>Pp-Kin2</b> | <b>Pp-Kin3</b> | <b>Pp-Kin4</b> | <b>Pr-Kin1</b> |
|----------------|---------------|----------------|----------------|----------------|----------------|----------------|
| <b>Ri-Kin</b>  | <b>100.00</b> | 58.41          | 50.45          | 51.35          | 32.14          | 38.94          |
| <b>Pp-Kin1</b> | 58.41         | <b>100.00</b>  | 59.46          | 60.36          | 29.36          | 42.73          |
| <b>Pp-Kin2</b> | 50.45         | 59.46          | <b>100.00</b>  | 80.18          | 31.13          | 38.98          |
| <b>Pp-Kin3</b> | 51.35         | 60.36          | 80.18          | <b>100.00</b>  | 28.30          | 37.96          |
| <b>Pp-Kin4</b> | 32.14         | 29.36          | 31.13          | 28.30          | <b>100.00</b>  | 37.27          |
| <b>Pr-Kin1</b> | 38.94         | 42.73          | 38.98          | 37.96          | 37.27          | <b>100.00</b>  |

**Supplementary Data 2:** Pair-wise identity matrix of Kininogen sequences of assassin bug *R. iracundus* (Ri\_Kin1), four Australian assassin bug *Pristhesancus plagipennis* (Pp\_Kin) kininogens and one African assassin bug *Platyeris rhadamanthus* (Pr\_Kin) kininogen.
