# Supplementary material for: Hexapod Assassins’ Potion: Venom Composition and Bioactivity from the Eurasian Assassin Bug Rhynocoris iracundus
Source: MDPI journal article supplement (doi:10.3390/biomedicines9070819), 2021-07-14
Supplement: s1 [file s1]

**Supplementary Data S5:** Accession numbers of the sequences which are used for alignments and phylogenetic analyses.

### **Redulysins**

Pr\_Redulysin1: QHB21612.1  
Pr\_Redulysin2: QHB21549.1  
Pr\_Redulysin3: QHB21546.1  
Pr\_Redulysin4: QHB21541.1  
Pr\_Redulysin5: QHB21548.1  
Pr\_Redulysin6: QHB21542.1  
Pr\_Redulysin7: QHB21544.1  
Pr\_Redulysin8: QHB21545.1  
Pr\_Redulysin9: QHB21543.1  
Pr\_Redulysin10: QHB21547.1  
Pp\_Redulysin1: AQM58319.1  
Pp\_Redulysin2: AQM58384.1  
Pp\_Redulysin3: AQM58383.1  
Pp\_Redulysin4: AQM58381.1  
Pp\_Redulysin5: AQM58379.1  
Pp\_Redulysin6: AQM58385.1  
Pp\_Redulysin7: AQM58378.1  
Pp\_Redulysin8: AQM58386.1  
Pp\_Redulysin9: AQM58382.1  
Ti\_Trialysin1: AAL82380.1  
Ti\_Trialysin2: ABQ09358.1  
Ti\_Trialysin3: AAL82381.1  
Rp\_Trialysin1: BAV31387.1  
Rp\_Trialysin2: BAV31386.1

### **Kininogen**

Pp\_Kin1: AQM58342.1  
Pp\_Kin2: AQM58341.1  
Pp\_Kin3: AQM58343.1  
Pp\_Kin4: AQM58345.1  
Pr\_Kin1: QHB21503.1

### **Chitinase**

Pp\_Chi: ATU82720.1  
Stingbug\_Chi: XP\_014294774.1  
Cl\_Chi: XP\_014243752.1  
Fo\_Chi: XP\_026279359.1  
Hs\_Chi: EFN89634.1

Ac\_Chi: XP\_016922880.1

### **Hemolysin**

Pr\_Hly1: QHB21514.1

Pr\_Hly2: QHB21508.1

Pr\_Hly3: QHB21510.1

Pr\_Hly4: QHB21511.1

Pp\_Hly1: ATU82699.1

Pp\_Hly2: ATU82700.1

Pp\_Hly3: ATU82704.1

Pp\_Hly4: ATU82703.1

Pc\_Hly: BBA30644.1

Ti\_Hly: ABR27902.1

Ld\_Hly: ATU82448.1

### **Ptu1 family peptides / Conotoxins**

Pr\_Ptu1\_1: MN208349.1

Pr\_Ptu1\_2: MN208346.1

Pp\_Ptu1\_1: AQM58374

Pp\_Ptu1\_2: AQM58373

Pp\_Ptu1\_3: AQM58375.1

Pt\_Ptu1\_1: P58606

MVIIA: P05484.2

MVIIB: P05485.1

GVIIA/GVIIB: P05483.1

GVIA: P01522.2

CVID: P58920.1
