# Supplementary material for: Hexapod Assassins’ Potion: Venom Composition and Bioactivity from the Eurasian Assassin Bug Rhynocoris iracundus
Source: MDPI journal article supplement (doi:10.3390/biomedicines9070819), 2021-07-14
Supplement: s1 [file s1]

|                |                                                                |
|----------------|----------------------------------------------------------------|
| Ri_Redulysin1  | PKVPKPPKVPKPPKPGSSWKDKMKLKEQMKEKMKKAEMLNMGVKINMMQCE-EKTC       |
| Ri_Redulysin2  | ---GKFGDWIKGRWA---SMKAKMKKVGGKCKEFFKKGKEILKKKGKIKVDPLNCN-GNVC  |
| Ri_Redulysin3  | ---FKWGKIAGKIGK---GAKKAWKKMKPALKNVKKGAKLLKKHVKVTPFECD-DKTC     |
| Ri_Redulysin4  | ---IKWGKIGKNILK---GAKKAWKKMKPALKS AVKKGAKLLKKNAVKTPLECE-EKTC   |
| Pr_Redulysin1  | ---GFLGKLGKGLKK---VGKKFVKKMSSAMKAGVKKGMKMLKDNAIKVNPLECE-GKFC   |
| Pr_Redulysin3  | ----GFGDWAQGVWN---DAKNVFKKLKKAIKQKCKEGREYLNKGKGFKEPVICEGGKKC   |
| Pr_Redulysin5  | ---KGLKKFGKAVVQ---KGKKFIKKVKGPMKNIMKKGAALLKNLGVKINPLQCE-EKTC   |
| Pr_Redulysin6  | AE-LGLKKFGGQLAKGGKKFVKAMKKMKPEIKKLAKQGLEILKKFGVKIIPHLHCE-GKTC  |
| Pr_Redulysin7  | SKNKGNKVTSKDPSPKPKKKKFSLKGIKESIKKWTKKGMELLKNAGVKVNPFECA-EKRC   |
| Pr_Redulysin8  | ---GKVGDLKNKWD---KMKNSWKKVGKLLKAAFNGREYLNKGKIKVDVLSCQ-GSKC     |
| Pr_Redulysin9  | ---GKGLDWLKKQWG---KLKNSFKKVGAKVTATFNKGRDYLNKGKIKVDPLNCQ-GNKC   |
| Pr_Redulysin10 | ---GKVGDFWFKQWK---DFKNVMQKLSKEIKEACNKGREFLKKNTLKVDKIMCN-EGTC   |
| Pp_Redulysin1  | ----GFKDWWNNQVA---SAKNKFKKVKAIVDTIKKGKKYLKEKGVTMDFIVCEGGKQC    |
| Pp_Redulysin2  | ----SFSEWAKHQWD---GAKNQYKKVKAIVATIKKGKQYLKEKGVQMDPLVCEGGNQC    |
| Pp_Redulysin3  | ---FSWGNV---IGK---FVKKAWKKLPALKKAVKKGADILKKNAVKTVPFECD-DKTC    |
| Pp_Redulysin4  | ---IK---WIKNAWA---SMKSKMKKVGGKCKEFFKKGKEILKKKGKIKIDPLSCT-GNTC  |
| Pp_Redulysin5  | PKVPKAPKLPAKPKKPGKSMKDRLLKLEQMKEKMKKAEMLNMGVKINMMECE-EKTC      |
| Pp_Redulysin6  | ---INWGKIGKGILK---GAKKAWKKMKPALKS AVKKGAKLLKKNAVKTVPFECE-EKSC  |
| Pp_Redulysin7  | ---IKWGKIGKNIMK---GAKKAWKKMKPALKNVKKGGNLLRRNSVKVTPLECD-DKTC    |
| Pp_Redulysin8  | PKQPKLPKPPKPPKPGSSFKDKMKLKDMMKEKMKKAEMLNMGVKINMMECE-EKTC       |
| Pp_Redulysin9  | ---IK---WIKNAWA---SMKSKMKKVGGKCKEFFKKGKEILKKKGKIKIDPLSCT-GNTC  |
| Ti_Trialysin1  | ---IKPGKVLDFGKIVGVKVLKQLKKVSAVAKVAMKKGAALLKKMGVKISPLKCE-EKTC   |
| Ti_Trialysin2  | ---IKPGKVDFDKVGKVVGVKVLKQLKKVSLVAKLAMKKGAALLKKMGVKISPLKCE-EKTC |
| Ti_Trialysin3  | ---IKPGKVLDFGKIVSKVLKQLKKVSAVAKVAMKKGAALLKKMGVKISPLKCE-ENTC    |
| Rp_Trialysin1  | -----AFWD---KAFNLLKKV-----LHVSPLTCN-GANC                       |
| Rp_Trialysin2  | -----AFWD---KLFNFKKKT-----LSVEPLNCQ-GANC                       |

\* \*

|                |                                                                |
|----------------|----------------------------------------------------------------|
| Ri_Redulysin1  | KTCISFSIPGFEKTYCISMRFMRTNKNNTYVIFGIGKEGSPA-----VEQKLKLG-DLPS   |
| Ri_Redulysin2  | KSCVDFTLKK--RKFCVEAKFQSTS----IQMSLTQKQDDQEPKAVIGPFTINIG-NVPT   |
| Ri_Redulysin3  | KTCINLVFLG--VSACLKATISREDKVTYFTIAGLVNDSPQ-----FEEKIKLG-AVPR    |
| Ri_Redulysin4  | KTCIKLTFLG--MSACLRYTITRTNKNNTYFTIAGEVNGNTQ-----FEEKIRLG-DMPR   |
| Pr_Redulysin1  | KSCISML---TKTVCIKGTAERINKVAYILINPTIDGENK-----GEIKLKVG-DVPR     |
| Pr_Redulysin3  | KSCIFLPSMK--KKFCLELTFYQENKIKFIKVACIRERDDKEPKEVFPMPNIALG-KPST   |
| Pr_Redulysin5  | KTCIIMKIPT-EKSFCLQMTIMRTNKASYLKIALTKDDVSK-----FEQNIKLG-DVPR    |
| Pr_Redulysin6  | KSCIIFTIPA-EISLCVQVTFRLRTNKATYLI IALT KDDATL-----FEKRITMG-DVSN |
| Pr_Redulysin7  | KSCIKINLGK-EYSACAHIRFLNTNKGTYIVWGIGTGDKAA-----FEKKMKLG-SLTD    |
| Pr_Redulysin8  | RSCLIFTLKK--KQFCLEFEFSNTG---LKISLTQKQDDQEPKIMLGPFNKTG-NVPQ     |
| Pr_Redulysin9  | RSCVIFTLPK--KKFCIEYVFSTSA---ITVSLIKEKDDEE-KVLLGPFTIKTG-NIPK    |
| Pr_Redulysin10 | KSCVKIPLMP---SVCFEGDLSLDEG---FKFSVYFFKDGKILNYIVSKYFVKYG-DTLK   |
| Pp_Redulysin1  | KTCLVFLKMK--KKFCMELKFFSKDKVKYINVKLIRERDDKEPKELLKPIDIPIS-KAST   |
| Pp_Redulysin2  | KTCLSFLKMK--KKFCMEVKKFFSKGELRFANVKLIRERDDKEPKELFKPLDIPMG-KESN  |
| Pp_Redulysin3  | KTCINLVFLG--MSACMRATISREDKITYFTIAGEVNDSPQ-----FEEKIKLG-DVPR    |
| Pp_Redulysin4  | KSCIDFTMKK--RKFCIEALFQSSA----IQVSLTKQKAEQEPKAIIGPFSINIG-DIPK   |
| Pp_Redulysin5  | RTCISFSLPGFERTYCISMRFMRTNKNNTYVIFGMGLKDKPS-----KEIKLTLG-NLPS   |
| Pp_Redulysin6  | KTCINLVFLG--LSACLKATITRTNKNNTYFTISGEVNGNTQ-----FEEKIRLG-DLPR   |
| Pp_Redulysin7  | KTCINLVFLG--LSACLKATISREDKVTYFTIAGDVNGSPQ-----FQEKIKLG-DVPR    |
| Pp_Redulysin8  | KTCISFSLPGFERTYCISMRFMRTNKNNTYVIFGMGLKDKPS-----KEIKLTLG-NLPS   |
| Pp_Redulysin9  | KSCIDFTMKK--RKFCIEALFQSSA----IQVSLTKQKAEQEPKAIIGPFSINIG-DIPK   |
| Ti_Trialysin1  | KSCVIFKIPT-ENSFCLTIRFMKTNIATYLVVAGEINRKS-----FEEKLKLKLG-NMPR   |
| Ti_Trialysin2  | KSCVIFKIPT-ENSFCLTIRFMKTNIATYLVVAGEINRKS-----FEEKLKLKLG-NMPR   |
| Ti_Trialysin3  | KSCVIFKIPT-ENSFCLTIRFMKTNIATYLVVAGEINRKS-----FEEKLKLKLG-NMPR   |
| Rp_Trialysin1  | KTCLSA--FG--KGGCVTVNYNKQAGAN---AAIQVNVQSNSGRNI-WNGSINAGRVPVS   |
| Rp_Trialysin2  | RTCVKV--LG--KGGCIGIGYNKQGGAN---AAIQVSVQSGSGRNI-WNGNINAGRVPVS   |

\* \*

|                |                                                               |
|----------------|---------------------------------------------------------------|
| Ri_Redulysin1  | CFSLG-ELLGKVCVKVEGRAKTSQGQGNVNFCLGLLAEKFSLGAKFCATYQDKK-LKIR   |
| Ri_Redulysin2  | CKSLG-KVIGPVCLQGVEGRAKSSKGQAHNVFCAAALLKNYGIGAKFCIGYVDGK-FTGS  |
| Ri_Redulysin3  | CVNAG-SVIGKICIKGMEGKGKSSQGKAQNVNFCGLGLAEQHNIGVKVCATYENKK-FKIK |
| Ri_Redulysin4  | CVNAG-SVIGKLCCLKGLEGKGKSSQGKAQNVNFCGLGLAEKHNVGKVCASYE-----    |
| Pr_Redulysin1  | CVNFG-GLLGKICCLKGLEGKAKSSSGQANVKFCLAMLAEKYNVGCKFCAIYANKK-FK-I |
| Pr_Redulysin3  | CIKLG-SILGKLCCLKGVEGKAKSSKGQANINFCLAFVLKNFVGAKLCGSYEQGM-MNFK  |
| Pr_Redulysin5  | CLNLG-GFIGIKCLKGIEGRAKSSQGQGNVNFCLGIVAEKFGFGCKFCATYENKK-LKVK  |
| Pr_Redulysin6  | CFKTNIDVIGDICKLGIEAHESSGQANVNFCLGLVLAQKLGIGVKFCIVYANKQ-LSVK   |
| Pr_Redulysin7  | CKDCG-GFLGEVCIQSFEGRAKSSKGQANINFCLGILVKNLGFGIKGCFSYENKK-LSFK  |
| Pr_Redulysin8  | CCKLG-SFIGQLCLQGVEGRIKSSNGKPHVNLCAVALLKRFVGAKICIGLEDGK-FKFK   |
| Pr_Redulysin9  | CCKLG-SFIGELCLQGVEGRLKSSNGKPHVNLGVLLLLKFGCGAKICVSYVDGK-FSVS   |
| Pr_Redulysin10 | CLPPV-KVLGTPCVQAKAGVIKSSDGKSYLNMCAIAMLKANACIKYCVTLENHK-IFK    |
| Pp_Redulysin1  | CVKLG-SWFGKCCCLQGVEGKITPK----SVNFCIAAVLKSYGVAKLCLTHEDGK-TKVR  |
| Pp_Redulysin2  | CIKLG-SWFGKCCIQGVEGTIKAN----NINFCAAVLKEYGVGAKICLNHENGK-LKVR   |
| Pp_Redulysin3  | CVNAG-SVIGKLCIKGVEGKGKSSQGQAQNVNFCGLGLAEQHNVGAKVCATYENKK-FKIK |
| Pp_Redulysin4  | CKNLG-KVLGDICLQGVEGRAKSSKGKPHINFCAVALLKTYGVGAKLCIGVEDGK-FKMR  |
| Pp_Redulysin5  | CLSLG-ELLGKVCVKVEGRAKTSQGQGNVNFCLGLLAEKFSIGAKFCATYQDKK-LKIR   |
| Pp_Redulysin6  | CVNAG-SVIGKLCIKGMEGKGKSSQGKANVNFCLGLAEKHNVGKVCATYENKK-FKIK    |
| Pp_Redulysin7  | CLNAG-SVIGKICVKGVEGKGKSSQGKANVNFCLGLGLAEKHNVGKVCATYENKK-FKVK  |
| Pp_Redulysin8  | CLSLG-ELLGKVCVKVEGRAKTSQGQGNVNFCLGLLAEKFSIGAKFCATYQDKK-LKIR   |
| Pp_Redulysin9  | CKNLG-KVLGDICLQGVEGRAKSSKGKPHINFCAVALLKTYGVGAKLCIGVEDGK-MKMR  |
| Ti_Trialysin1  | CVNVE-GFIGKVCМКGIEGHAKSSSGQANVNFCLGLVAEKFGVGAKLCGIYANKK-VRVK  |
| Ti_Trialysin2  | CVNVE-GFIGKVCМКGIEGHAKSSSGQANVNFCLGLVAEKFGVGAKLCGIYANKK-VRVK  |
| Ti_Trialysin3  | CVNVE-GFIGKVCМКGIEGHAKSSSGQANVNFCLGLVAEKFGVGAKLCGIYANKK-VRVK  |
| Rp_Trialysin1  | CVNLP-KPIKEVCIQDVW--VSVGQNGPNGDVCFTINFKSYSLGAKFCAGFNAASGFVPQ  |
| Rp_Trialysin2  | CVNLP-KPIKEVICQNFV--VTVGQNGQNGDVCFTINFKSYSTGIKFCAGYTAQGGFAPH  |

**Supplementary Data 1. Amino acid sequence alignment of assassin bug redulysins together with homolog from kissing bug trialysins by MAFFT.** Alignment of *R. iracundus* redulysin, together with African assassin bug *Platymeris rhadamanthus* (Pr\_Redulysin), Australian assassin bug *Pristhesancus plagipennis* redulysin (Pp\_Redulysin) and homolog toxin Trialysin from blood feeding *Triatoma infectans*, vector of *Trypanosoma cruzi*. Eight conserved cysteine residues are shown with asterisk (\*).
