# Supplementary material for: Hexapod Assassins’ Potion: Venom Composition and Bioactivity from the Eurasian Assassin Bug Rhynocoris iracundus
Source: MDPI journal article supplement (doi:10.3390/biomedicines9070819), 2021-07-14
Supplement: s1 [file s1]

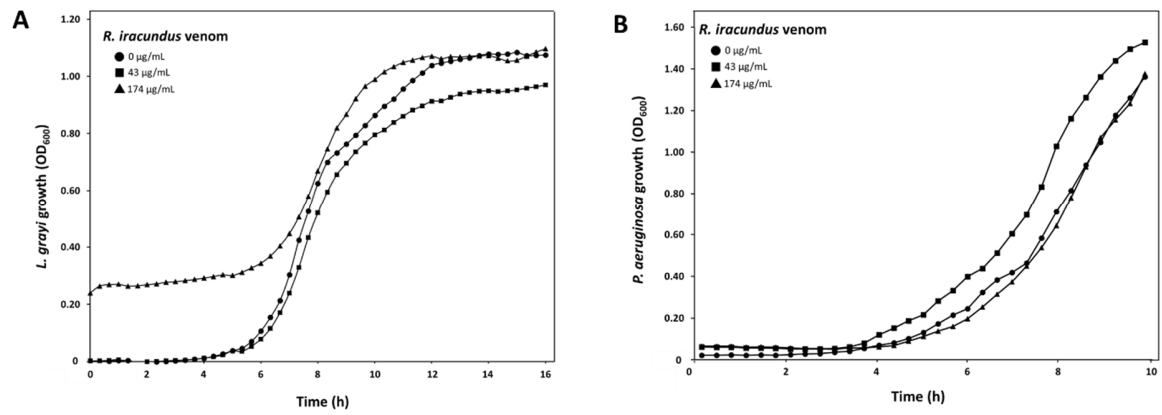

**Figure S1. *Rhynocoris iracundus* venom against *Listeria grayi* and *Pseudomonas aeruginosa* growth.** Venom activity was tested using different concentrations of crude venom incubated together with *Listeria grayi* and *Pseudomonas aeruginosa*. Bacterial growth of *L. grayi* and *P. aeruginosa* was monitored by measuring OD<sub>600</sub> values at 20 min intervals for 16 h and 10 h, respectively. Venom did not inhibited the growth of both tested bacteria at tested concentrations (43 µg/mL and 174 µg/mL).
