# Supplementary material for: Hexapod Assassins’ Potion: Venom Composition and Bioactivity from the Eurasian Assassin Bug Rhynocoris iracundus
Source: MDPI journal article supplement (doi:10.3390/biomedicines9070819), 2021-07-14
Supplement: s1 [file s1]

|           | Ri_Ptu1_1 | Ri_Ptu1_2 | Ri_Ptu1_3 | Ri_Ptu1_4 | Ri_Ptu1_5 | Ri_Ptu1_6 | Pr_Ptu1_1 | Pr_Ptu1_2 | Pp_Ptu1_1 | Pp_Ptu1_2 | Pp_Ptu1_3 | Pt_Ptu1_1 | MVIIA  |
|-----------|-----------|-----------|-----------|-----------|-----------|-----------|-----------|-----------|-----------|-----------|-----------|-----------|--------|
| Ri_Ptu1_1 | 100.00    | 35.85     | 26.53     | 15.91     | 38.46     | 30.00     | 47.92     | 50.00     | 83.64     | 26.92     | 33.96     | 35.48     | 27.45  |
| Ri_Ptu1_2 | 35.85     | 100.00    | 31.91     | 20.45     | 37.25     | 33.33     | 43.75     | 42.31     | 35.85     | 28.85     | 78.18     | 35.48     | 24.49  |
| Ri_Ptu1_3 | 26.53     | 31.91     | 100.00    | 30.23     | 44.00     | 30.77     | 30.95     | 30.61     | 26.53     | 79.63     | 34.04     | 45.45     | 45.45  |
| Ri_Ptu1_4 | 15.91     | 20.45     | 30.23     | 100.00    | 33.33     | 28.26     | 23.08     | 25.00     | 20.45     | 25.58     | 22.73     | 32.26     | 31.11  |
| Ri_Ptu1_5 | 38.46     | 37.25     | 44.00     | 33.33     | 100.00    | 31.37     | 36.96     | 37.25     | 38.46     | 38.00     | 41.18     | 32.26     | 36.17  |
| Ri_Ptu1_6 | 30.00     | 33.33     | 30.77     | 28.26     | 31.37     | 100.00    | 25.58     | 36.73     | 26.00     | 32.69     | 31.25     | 36.36     | 27.78  |
| Pr_Ptu1_1 | 47.92     | 43.75     | 30.95     | 23.08     | 36.96     | 25.58     | 100.00    | 42.55     | 45.83     | 27.66     | 45.83     | 31.03     | 25.00  |
| Pr_Ptu1_2 | 50.00     | 42.31     | 30.61     | 25.00     | 37.25     | 36.73     | 42.55     | 100.00    | 53.70     | 27.45     | 48.08     | 35.48     | 22.00  |
| Pp_Ptu1_1 | 83.64     | 35.85     | 26.53     | 20.45     | 38.46     | 26.00     | 45.83     | 53.70     | 100.00    | 28.85     | 33.96     | 32.26     | 27.45  |
| Pp_Ptu1_2 | 26.92     | 28.85     | 79.63     | 25.58     | 38.00     | 32.69     | 27.66     | 27.45     | 28.85     | 100.00    | 30.77     | 42.42     | 22.45  |
| Pp_Ptu1_3 | 33.96     | 78.18     | 34.04     | 22.73     | 41.18     | 31.25     | 45.83     | 48.08     | 33.96     | 30.77     | 100.00    | 38.71     | 20.41  |
| Pt_Ptu1_1 | 35.48     | 35.48     | 45.45     | 32.26     | 32.26     | 36.36     | 31.03     | 35.48     | 32.26     | 42.42     | 38.71     | 100.00    | 30.00  |
| MVIIA     | 27.45     | 24.49     | 45.45     | 31.11     | 36.17     | 27.78     | 25.00     | 22.00     | 27.45     | 22.45     | 20.41     | 30.00     | 100.00 |

**Supplementary Data 4:** Pair-wise identity matrix of Ptu1 family peptide sequences of assassin bug *R. iracundus* (Ri\_Ptu1), Australian assassin bug *Pristhesancus plagipennis* (Pp\_Ptu1), African assassin bug *Platymeris rhadamanthus* (Pr\_Ptu1), *Peirates turpis* (Pt\_Ptu1) and homolog toxin “ $\omega$ - conotoxins” (MVIIA) from a cone snail.
