# Supplementary material for: Hexapod Assassins’ Potion: Venom Composition and Bioactivity from the Eurasian Assassin Bug Rhynocoris iracundus
Source: Biomedicines. 2021 Jul 14;9(7):819. doi: 10.3390/biomedicines9070819 (PMC8301361; doi:10.3390/biomedicines9070819)
Supplement: Supplementary file 1 [file biomedicines-09-00819-s001.zip]

Archive with 8 entries (8 files):
- Supplementary Data S1- Redulysin Alignment.pdf
- Supplementary Data S2 - Pair-wise identity matrix of Kininogen sequences.pdf
- Supplementary Data S3 - Chitinase alignment.pdf
- Supplementary Data S4 - Pair-wise identity matrix of Ptu1 sequences.pdf
- Supplementary Data S5 - Accession numbers of the sequences.pdf
- Supplementary Figure S1 - R. iracundus venom against Listeria grayi and Pseudomonas aeruginosa growth.pdf
- Supplementary Table S1- Venom proteome information of R. iracundus.xlsx
- Supplementary Table S2 - Chitinase active domain information.xlsx
