# Supplementary material for: Hexapod Assassins’ Potion: Venom Composition and Bioactivity from the Eurasian Assassin Bug Rhynocoris iracundus
Source: Biomedicines. 2021 Jul 14;9(7):819. doi: 10.3390/biomedicines9070819 (PMC8301361; doi:10.3390/biomedicines9070819)
Supplement: Supplementary file 1 [file biomedicines-09-00819-s001.zip › Supplementary Table S1- Venom proteome information of R. iracundus.xlsx]

## Sheet: SI Table
	SDS band No.	Run 1							Run 2
		m/z	z	PSM	PTM	Transcriptome hit	Toxin	Protein family	m/z	z	PSM	PTM	Transcriptome hit	Toxin	Protein family
	1	450.28	3	VLMK*VYLNVVK	K - acetylation	Rira_VGS_C258	trypsin	trypsin	786.41	3	EAAVNEYPFAVLIMLK*T*RK*	K - acetylation T - phosphorylation	Rira_VGS_C539	S1 protease 7	S1 protease
	2	523.79	2	LSLIKDDN*K	N - deamidation	Rira_VGS_C2054	venom protein family 13 protein 2b	Venom protein family 13	559.55	4	KLITPIYQN*YSNLLN*VPDK	N - deamidation	Rira_VGS_C6996	aminopeptidase	Aminopeptidase
		738.05	3	N*PKLKT*LLAIGGWSFGTQK	N - deamidation T- phosphorylation	Rira_VGS_C2119	chitinase 3	chitinase	692.37	2	VIGPVCLQGVEGR	-	Rira_VGS_C160	redulysin	Redulysin
	3	552.29	4	KWRSLPDPDAQNPIPTN*VR	N - deamidation	Rira_VGS_C6996	aminopeptidase	Aminopeptidase	527.28	2	QVVAGFNYR	-	Rira_VGS_C992	kininogen 1	Kininogen
		568.26	3	HSGGETEPQCGSASGLK	-	Rira_VGS_C1321	S1 protease 2	S1 protease	609.83	2	IALAAENAGNFK	-	Rira_VGS_C992	kininogen 1
		767.4	2	IGIKCPSLWMTK	K - acetylation M - oxidation	Rira_VGS_C1321	S1 protease 2		693.34	2	TCISFSIPGFEK	-	Rira_VGS_C297	redulysin 8	Redulysin
	4	527.28	2	QVVAGFNYR	-	Rira_VGS_C992	kininogen 1	Kininogen	527.28	2	QVVAGFNYR	-	Rira_VGS_C992	kininogen 1	Kininogen
		645.82	2	VEFEAEVPGEGK	-	Rira_VGS_C992	kininogen 1		645.82	2	VEFEAEVPGEGK	-	Rira_VGS_C992	kininogen 1
		-	-	-	-	-	-		609.83	2	IALAAENAGNFK	-	Rira_VGS_C992	kininogen 1
		-	-	-	-	-	-		518.76	2	Q*VVAGFNYR	Q - pyroglutamination	Rira_VGS_C992	kininogen 1
		-	-	-	-	-	-		601.81	2	EISPDDASLKK	-	Rira_VGS_C992	kininogen 1
		523.79	2	LSLIKDDN*K	N - deamidation	Rira_VGS_C2054	venom protein family 13 protein 2b	Venom protein family 13	523.79	2	LSLIKDDN*K	N - deamidation	Rira_VGS_C2054	venom protein family 13 protein 2b	Venom protein family 13
		-	-	-	-	-	-		793.9	2	DDEGQSIGLQVVQK	-	Rira_VGS_C2405	redulysin 5	Redulysin
		-	-	-	-	-	-		555.75	2	VTPFECDDK	-	Rira_VGS_C2405	redulysin 5
		-	-	-	-	-	-		536.81	2	IQSQIQDLK	-	Rira_VGS_C2405	redulysin 5
		-	-	-	-	-	-		847.95	2	TCINLVFLGVSACLK	-	Rira_VGS_C91	redulysin 1
		-	-	-	-	-	-		824.42	2	TIAGLVNDSPQFEEK	-	Rira_VGS_C91	redulysin 1
		552.77	2	VTPLECEEK	-	Rira_VGS_C73	redulysin 7	Redulysin	552.77	2	VTPLECEEK	-	Rira_VGS_C73	redulysin 7
		-	-	-	-	-	-		738.37	2	Q*NVWDWIFSK*K	K - acetylation Q - pyroglutamination	Rira_VGS_C28	venom protein family 14	Venom protein family 14
		-	-	-	-	-	-		509.29	2	QTLSAALSAR	-	Rira_VGS_C15	multicystatin-like isoform X1	Multicystatin-like isoform
	5	609.83	2	IALAAENAGNFK	-	Rira_VGS_C992	kininogen 1	Kininogen	609.83	2	IALAAENAGNFK	-	Rira_VGS_C992	kininogen 1	Kininogen
		645.82	2	VEFEAEVPGEGK	-	Rira_VGS_C992	kininogen 1		738.05	3	IS*YWQKLGRRPGSN*IVTR	N - deamidation T - phosphorylation	Rira_VGS_C992	kininogen 1
		527.28	2	QVVAGFNYR	-	Rira_VGS_C992	kininogen 1		527.28	2	QVVAGFNYR	-	Rira_VGS_C992	kininogen 1
		518.76	2	Q*VVAGFNYR	Q - pyroglutamination	Rira_VGS_C992	kininogen 1		-	-	-	-	-	-
		537.77	2	EISPDDASLK	-	Rira_VGS_C992	kininogen 1		-	-	-	-	-	-
		653.36	2	ATVQVVNGINYK	-	Rira_VGS_C15	multicystatin-like isoform X1	Multicystatin-like isoform	509.29	2	QTLSAALSAR	-	Rira_VGS_C15	multicystatin-like isoform X1	Multicystatin-like isoform
		767.39	2	IDFEAQTPGSNQVK	-	Rira_VGS_C15	multicystatin-like isoform X1		767.39	2	IDFEAQTPGSNQVK	-	Rira_VGS_C15	multicystatin-like isoform X1
		-	-	-	-	-	-		586.32	4	DDIKQTLSAALSARNSPDVVLK	-	Rira_VGS_C15	multicystatin-like isoform X1
		630.33	2	QIDGILPDFNK	-	Rira_VGS_C485	cystatin-like protein 5	Cystatin-like protein	730.89	2	VCNAVFIVQPWK	-	Rira_VGS_C485	cystatin-like protein 5
		621.82	2	Q*IDGILPDFNK	Q - pyroglutamination	Rira_VGS_C485	cystatin-like protein 5		-	-	-	-	-	-
		790.83	2	TGDCEIWGDGDDLK	-	Rira_VGS_C485	cystatin-like protein 5		-	-	-	-	-	-
		401.85	3	SFVT*ENK*EK	K - acetylation T - phosphorylation	Rira_VGS_C6996	aminopeptidase	Aminopeptidase	723.9	4	LKLIADIEEPNFNFSGAVSISVKCLK	-	Rira_VGS_C6996	aminopeptidase	Aminopeptidase
		686.86	2	ICAGCVIPIQNK	-	Rira_VGS_C5326	Cys inhibitor	Cys inhibitor	-	-	-	-	-	-
		530.32	2	ILSGTTQVIK	-	Rira_VGS_C5326	Cys inhibitor		-	-	-	-	-	-
	6	594.3	2	GYFLVFDGNR	-	Rira_VGS_C16	S1 protease CUB domain 3	S1 protease CUB domain	842.95	2	K*IEEVK*PVETAETK	K - acetylation	Rira_VGS_C7760	hypothetical protein	Hypothetical protein
		800.92	2	AIESPAYPDIPAAGTK	-	Rira_VGS_C16	S1 protease CUB domain 3		-	-	-	-	-	-
		798.91	2	FCGSESGLAIKSVKN	-	Rira_VGS_C16	S1 protease CUB domain 3		-	-	-	-	-	-
		523.79	2	DDATTIGILK	-	Rira_VGS_C297	redulysin 8	Redulysin	-	-	-	-	-	-
		508.3	2	VKDLINDAK	-	Rira_VGS_C297	redulysin 8		-	-	-	-	-	-
		556.31	2	NTYVIFGIGK	-	Rira_VGS_C297	redulysin 8		-	-	-	-	-	-
		516.73	2	FCATYQDK	-	Rira_VGS_C297	redulysin 8		-	-	-	-	-	-
		770.33	2	EDEGHALDAVPEEE	-	Rira_VGS_C160	redulysin 4a		-	-	-	-	-	-
		636.89	2	IVLSCVILISR	-	Rira_VGS_C539	S1 protease 7	S1 protease	-	-	-	-	-	-
		565.78	4	ILK*PGDELTLWPN*VES*K*R	K - acetylation S - phosphorylation N - deamidation	Rira_VGS_C539	S1 protease 7		-	-	-	-	-	-
		730.89	2	VCNAVFIVQPWK	-	Rira_VGS_C485	cystatin-like protein 5	Cystatin-like protein	-	-	-	-	-	-
		516.74	2	YM*VEFEAK	M - oxidation	Rira_VGS_C485	cystatin-like protein 5		-	-	-	-	-	-
		917.47	2	EDKVCNAVFIVQPWK	-	Rira_VGS_C485	cystatin-like protein 5		-	-	-	-	-	-
		609.83	2	IALAAENAGNFK	-	Rira_VGS_C992	kininogen 1	Kininogen	-	-	-	-	-	-
		645.82	2	VEFEAEVPGEGK	-	Rira_VGS_C992	kininogen 1		-	-	-	-	-	-
		527.28	2	QVVAGFNYR	-	Rira_VGS_C992	kininogen 1		-	-	-	-	-	-
		518.76	2	Q*VVAGFNYR	Q - pyroglutamination	Rira_VGS_C992	kininogen 1		-	-	-	-	-	-
		601.81	2	EISPDDASLKK	-	Rira_VGS_C992	kininogen 1		-	-	-	-	-	-
		480.76	2	SPDDASLKK	-	Rira_VGS_C992	kininogen 1		-	-	-	-	-	-
		579.31	4	EKLKAAQLAADQSVETAIANNK	-	Rira_VGS_C6996	aminopeptidase	Aminopeptidase	611.84	2	E*LEIK*PQDVK	K - acetylation E - pyroglutamination	Rira_VGS_C6996	aminopeptidase	Aminopeptidase
		776.41	2	EKFNSISNM*PLKK	M - oxidation	Rira_VGS_C6996	aminopeptidase		594.3	4	YVNSNHGSEKNNILIALACTR	-	Rira_VGS_C6996	aminopeptidase
		520.27	4	WRSLPDPDAQN*PIPTNVR	N - deamidation	Rira_VGS_C6996	aminopeptidase		-	-	-	-	-	-
	7	695.81	2	VDPLNCNGN*VCK	N - deamidation	Rira_VGS_C160	redulysin 4a	Redulysin	693.85	2	FQSTSIQM*SLTK	M - oxidation	Rira_VGS_C160	redulysin 4a	Redulysin
		551.81	2	AVIGPFTIN*IG	N - deamidation	Rira_VGS_C160	redulysin 4a		485.24	2	SCVDFTLK	-	Rira_VGS_C160	redulysin 4a
		583.82	2	CVDFTLKKR	-	Rira_VGS_C160	redulysin 4a		770.33	2	EDEGHALDAVPEEE	-	Rira_VGS_C160	redulysin 4a
		-	-	-	-	-	-		494.24	2	QKDDQEPK	-	Rira_VGS_C160	redulysin 4a
		527.28	2	QVVAGFNYR	-	Rira_VGS_C992	kininogen 1	Kininogen	527.28	2	QVVAGFNYR	-	Rira_VGS_C992	kininogen 1	Kininogen
		610.33	2	IALAAENAGNFK	-	Rira_VGS_C992	kininogen 1		610.33	2	IALAAENAGNFK	-	Rira_VGS_C992	kininogen 1
		-	-	-	-	-	-		645.82	2	VEFEAEVPGEGK	-	Rira_VGS_C992	kininogen 1
		-	-	-	-	-	-		518.76	2	Q*VVAGFNYR	Q - pyroglutamination	Rira_VGS_C992	kininogen 1
		-	-	-	-	-	-		537.77	2	EISPDDASLK	-	Rira_VGS_C992	kininogen 1
		-	-	-	-	-	-		592.81	2	E*ISPDDASLKK	Q - pyroglutamination	Rira_VGS_C992	kininogen 1
		-	-	-	-	-	-		726.36	2	VEFDVNWSSGLAK	-	Rira_VGS_C16	S1 protease CUB domain 3	S1 protease CUB domain
		-	-	-	-	-	-		800.92	2	AIESPAYPDIPAAGTK	-	Rira_VGS_C16	S1 protease CUB domain 3
		-	-	-	-	-	-		594.3	2	GYFLVFDGNR	-	Rira_VGS_C16	S1 protease CUB domain 3
		-	-	-	-	-	-		776.4	2	CQVTVFAASSGISKP	-	Rira_VGS_C16	S1 protease CUB domain 3
		-	-	-	-	-	-		617.33	2	HVQLKKGDT*K	T - phosphorylation	Rira_VGS_C16	S1 protease CUB domain 3
		-	-	-	-	-	-		620.37	2	LINLIPQTGGGR	-	Rira_VGS_C68	S1 protease 2	S1 protease
		-	-	-	-	-	-		549.77	2	FDLYAPTGSK	-	Rira_VGS_C68	S1 protease 2
		-	-	-	-	-	-		422.71	2	VDVPSDGR	-	Rira_VGS_C68	S1 protease 2
		-	-	-	-	-	-		730.89	2	VCNAVFIVQPWK	-	Rira_VGS_C485	cystatin-like protein 5	Cystatin-like protein
		-	-	-	-	-	-		437.24	2	N*ADVQVVK	N - deamidation	Rira_VGS_C485	cystatin-like protein 5
		-	-	-	-	-	-		516.7	2	YM*VEFEAK	M - oxidation	Rira_VGS_C485	cystatin-like protein 5
		-	-	-	-	-	-		611.99	2	EDKVCNAVFIVQPWK	-	Rira_VGS_C485	cystatin-like protein 5
		-	-	-	-	-	-		628.61	3	TCAGCVYDAEPTPADKK	-	Rira_VGS_C485	cystatin-like protein 5
		-	-	-	-	-	-		566.33	2	IALSCVILSR	-	Rira_VGS_C1255	S1 protease 5	S1 protease
		-	-	-	-	-	-		440.72	2	SNVFDISV	-	Rira_VGS_C1255	S1 protease 5
		-	-	-	-	-	-		522.76	2	SPEPVEVCK	-	Rira_VGS_C1255	S1 protease 5
		-	-	-	-	-	-		776.9	2	VIDLEICKTIYN*A	-	Rira_VGS_C1255	S1 protease 5
		-	-	-	-	-	-		631.86	2	VEIEQIIYQK	-	Rira_VGS_C1060	venom protein family 1 protein 3	Venom protein family 1
		-	-	-	-	-	-		563.33	2	ILPAIEEVNK	-	Rira_VGS_C1060	venom protein family 1 protein 3
	8	610.33	2	IALAAENAGNFK	-	Rira_VGS_C992	kininogen 1	Kininogen	-	-	-	-	-	-
		645.82	2	VEFEAEVPGEGK	-	Rira_VGS_C992	kininogen 1		527.28	2	QVVAGFNYR	-	Rira_VGS_C992	kininogen 1	Kininogen
		527.28	2	QVVAGFNYR	-	Rira_VGS_C992	kininogen 1		528.8	2	RPGSNIVTRG	-	Rira_VGS_C992	kininogen 1
		518.76	2	Q*VVAGFNYR	Q - pyroglutamination	Rira_VGS_C992	kininogen 1		-	-	-	-	-	-
		542.27	2	Q*KVDVPSDGR	Q - pyroglutamination	Rira_VGS_C68	S1 protease 2	S1 protease	-	-	-	-	-	-
		549.78	2	FDLYAPTGSK	-	Rira_VGS_C68	S1 protease 2		-	-	-	-	-	-
		730.91	2	Q*FIK*VM*GWGLLK	K - acetylation Q - pyroglutamination M - oxidation	Rira_VGS_C68	S1 protease 2		-	-	-	-	-	-
		485.25	2	MVLTCAFK	-	Rira_VGS_C68	S1 protease 2		-	-	-	-	-	-
		692.88	2	VIGPVCLQGVEGR	-	Rira_VGS_C160	redulysin 4a	Redulysin	-	-	-	-	-	-
		927.42	2	LFPGDEEN*GTIM*EAGEK	M - oxidation N - deamidation	Rira_VGS_C160	redulysin 4a		-	-	-	-	-	-
		770.33	2	EDEGHALDAVPEEE	-	Rira_VGS_C160	redulysin 4a		-	-	-	-	-	-
		693.85	2	FQSTSIQM*SLTK	M - oxidation	Rira_VGS_C160	redulysin 4a		-	-	-	-	-	-
		631.86	2	VEIEQIIYQK	-	Rira_VGS_C1060	venom protein family 1 protein 3	Venom protein family 1	631.86	2	VEIEQIIYQK	-	Rira_VGS_C1060	venom protein family 1 protein 3	Venom protein family 3
		555.75	2	VTPFECDDK	-	Rira_VGS_C91	redulysin 1	Redulysin	-	-	-	-	-	-
		502.76	2	CVNAGSVIGK	-	Rira_VGS_C91	redulysin 1		-	-	-	-	-	-
		376.51	3	CVNAGS*VIGK*	K - acetylation S - phosphorylation	Rira_VGS_C91	redulysin 1		-	-	-	-	-	-
	9	549.78	2	FDLYAPTGSK	-	Rira_VGS_C68	S1 protease 2	S1 protease	549.78	2	FDLYAPTGSK	-	Rira_VGS_C68	S1 protease 2	S1 protease
		619.87	2	LINLIPQTGGGR	-	Rira_VGS_C68	S1 protease 2		619.87	2	LINLIPQTGGGR	-	Rira_VGS_C68	S1 protease 2
		-	-	-	-	-	-		422.71	2	VDVPSDGR	-	Rira_VGS_C68	S1 protease 2
		-	-	-	-	-	-		542.27	2	Q*KVDVPSDGR	Q - pyroglutamination	Rira_VGS_C68	S1 protease 2
		527.28	2	QVVAGFNYR	-	Rira_VGS_C992	kininogen 1	Kininogen	527.28	2	QVVAGFNYR	-	Rira_VGS_C992	kininogen 1	Kininogen
		518.76	2	Q*VVAGFNYR	Q - pyroglutamination	Rira_VGS_C992	kininogen 1		518.76	2	Q*VVAGFNYR	Q - pyroglutamination	Rira_VGS_C992	kininogen 1
		610.33	2	IALAAENAGNFK	-	Rira_VGS_C992	kininogen 1		610.33	2	IALAAENAGNFK	-	Rira_VGS_C992	kininogen 1
		566.33	2	IALSCVILSR	-	Rira_VGS_C1255	S1 protease 5	S1 protease	900.99	2	AVIGPFTINIGNVPTCK	-	Rira_VGS_C160	redulysin 4a	Redulysin
		621.79	2	E*SSPEPVEVCK	E - pyroglutamination	Rira_VGS_C1255	S1 protease 5		695.81	2	VDPLNCN*GNVCK	N - deamidation	Rira_VGS_C160	redulysin 4a
		494.25	2	C*VNAGSVIGK	C - pyroglutamination	Rira_VGS_C73	redulysin 7	Redulysin	502.76	2	CVNAGSVIGK	-	Rira_VGS_C73	redulysin 7	Redulysin
		693.34	2	TCISFSIPGFEK	-	Rira_VGS_C297	redulysin 8		555.75	2	VTPFECDDK	-	Rira_VGS_C2404	redulysin 5	Redulysin
	10	693.35	2	TCISFSIPGFEK	-	Rira_VGS_C297	redulysin 8	Redulysin	853.45	2	LGDLPSCFSLGELLGK	-	Rira_VGS_C297	redulysin 8	Redulysin
		-	-	-	-	-	-		556.31	2	NTYVIFGIGK	-	Rira_VGS_C297	redulysin 8
		-	-	-	-	-	-		516.73	2	FCATYQDK	-	Rira_VGS_C297	redulysin 8
		-	-	-	-	-	-		693.35	2	TCISFSIPGFEK	-	Rira_VGS_C297	redulysin 8
		-	-	-	-	-	-		472.27	2	LSVETGPLK	-	Rira_VGS_C539	S1 protease 7	S1 protease
		-	-	-	-	-	-		517.77	2	VMGWGLTK*T	K - acetylation	Rira_VGS_C539	S1 protease 7
		-	-	-	-	-	-		1005	2	VCLPSSS*NLNLLNEQIK	S - phosphorylation	Rira_VGS_C539	S1 protease 7
		527.28	2	QVVAGFNYR	-	Rira_VGS_C992	kininogen 1	Kininogen	527.28	2	QVVAGFNYR	-	Rira_VGS_C992	kininogen 1	Kininogen
		-	-	-	-	-	-		518.76	2	Q*VVAGFNYR	Q - pyroglutamination	Rira_VGS_C992	kininogen 1
		610.33	2	IALAAENAGNFK	-	Rira_VGS_C992	kininogen 1	Kininogen	610.33	2	IALAAENAGNFK	-	Rira_VGS_C992	kininogen 1
		-	-	-	-	-	-		645.82	2	VEFEAEVPGEGK	-	Rira_VGS_C992	kininogen 1
		-	-	-	-	-	-		693.85	2	FQSTSIQM*SLTK	M - oxidation	Rira_VGS_C160	redulysin 4a	Redulysin
		-	-	-	-	-	-		770.33	2	EDEGHALDAVPEEE	-	Rira_VGS_C160	redulysin 4a
		-	-	-	-	-	-		692.37	2	VIGPVCLQGVEGR	-	Rira_VGS_C160	redulysin 4a
		-	-	-	-	-	-		619.87	2	LINLIPQTGGGR	-	Rira_VGS_C68	S1 protease 2	S1 proteine
		-	-	-	-	-	-		573.82	2	TQRETAATRI	-	Rira_VGS_C68	S1 protease 2
		643.32	2	IEEDPSLTPER	-	Rira_VGS_C2314	inositol phosphatase-like protein 1	Inositol phosphatase-like protein	643.32	2	IEEDPSLTPER	-	Rira_VGS_C2314	inositol phosphatase-like protein 1	Inositol phosphatase-like protein
		-	-	-	-	-	-		571.66	2	QIELLEKDQLLQSR	-	Rira_VGS_C2314	inositol phosphatase-like protein 1
		-	-	-	-	-	-		621.82	2	Q*IDGILPDFNK	Q - pyroglutamination	Rira_VGS_C458	venom protein family 5 protein 1	Venom protein family 5
		-	-	-	-	-	-		790.83	2	TGDCEIWGDGDDLK	-	Rira_VGS_C458	venom protein family 5 protein 1
		-	-	-	-	-	-		407.75	2	AGPSTIIR	-	Rira_VGS_C686	S1 protease 6	S1 proteine
		-	-	-	-	-	-		612.31	2	SLVVTVGDYDR	-	Rira_VGS_C686	S1 protease 6
		-	-	-	-	-	-		693.42	2	TLGILGVFDPIIK	-	Rira_VGS_C24558	lipase-like protein 2	Lipase-like protein
	11	-	-	-	-	-	-		531.29	2	LLEAQTCVK	-	Rira_VGS_C1199	astacin-like protein 2	Astacin-like protein
		-	-	-	-	-	-		564.31	2	TVDPEILGQR	-	Rira_VGS_C1199	astacin-like protein 2
		-	-	-	-	-	-		670.34	2	DPTVDPEILGQR		Rira_VGS_C1199	astacin-like protein 2
		-	-	-	-	-	-		470.27	2	DNHVTILK		Rira_VGS_C1199	astacin-like protein 2
		-	-	-	-	-	-		610.31	2	N*GQIPYVYHK	N - deamidation	Rira_VGS_C1199	astacin-like protein 2
		-	-	-	-	-	-		428.24	2	ADRDNHVTILK	-	Rira_VGS_C1199	astacin-like protein 2
		-	-	-	-	-	-		692.37	2	VIGPVCLQGVEGR	-	Rira_VGS_C160	redulysin 4a	Redulysin
		-	-	-	-	-	-		900.99	2	AVIGPFTINIGNVPTCK	-	Rira_VGS_C160	redulysin 4a
		-	-	-	-	-	-		770.33	2	EDEGHALDAVPEEE	-	Rira_VGS_C160	redulysin 4a
		-	-	-	-	-	-		693.85	2	FQSTSIQM*SLTK	M - oxidation	Rira_VGS_C160	redulysin 4a
		-	-	-	-	-	-		608.82	2	TINIGNVPTCK	-	Rira_VGS_C160	redulysin 4a
		-	-	-	-	-	-		927.42	2	LFPGDEEN*GTIM*EAGEK	N - deamidation M- oxidation	Rira_VGS_C160	redulysin 4a
		-	-	-	-	-	-		630.33	2	QIDGILPDFNK	-	Rira_VGS_C458	venom protein family 5 protein 1	Venom protein family 5
		-	-	-	-	-	-		621.82	2	Q*IDGILPDFNK	Q - pyroglutamination	Rira_VGS_C458	venom protein family 5 protein 1
		-	-	-	-	-	-		635.34	2	TNIFLVPYM*R	M - oxidation	Rira_VGS_C458	venom protein family 5 protein 1
		-	-	-	-	-	-		565.28	2	IDGTNPELDR	-	Rira_VGS_C1890	S1 protease 42	S1 protease
		-	-	-	-	-	-		561.78	2	IQLDNYGSGR	-	Rira_VGS_C1890	S1 protease 42
		-	-	-	-	-	-		615.81	2	SVYFSVTEGNK	-	Rira_VGS_C1890	S1 protease 42
		-	-	-	-	-	-		698.36	2	AFEVFLEVAENK	-	Rira_VGS_C59	venom protein family 2 protein 4	Venom protein family 2
		-	-	-	-	-	-		915.46	2	DAPM*VSLQSIGDGPVTAR	-	Rira_VGS_C59	venom protein family 2 protein 4
		-	-	-	-	-	-		592.8	2	S*IEDTVLSIK	-	Rira_VGS_C59	venom protein family 2 protein 4
		-	-	-	-	-	-		853.45	2	LGDLPSCFSLGELLGK	-	Rira_VGS_C297	redulysin 8	Redulysin
		-	-	-	-	-	-		516.73	2	FCATYQDK	-	Rira_VGS_C297	redulysin 8
		-	-	-	-	-	-		632.31	2	NVFNDVIGEEK	-	Rira_VGS_C1553	nuclease-like protein 1	Nuclease-like protein
		-	-	-	-	-	-		502.78	2	FGRPGAMIR	-	Rira_VGS_C1553	nuclease-like protein 1
		-	-	-	-	-	-		502.76	2	CVNAGSVIGK	-	Rira_VGS_C91	redulysin 1	Redulysin
		-	-	-	-	-	-		1121.08	2	LNPELFAGGIDDSGDIVVANPK	-	Rira_VGS_C91	redulysin 1
	12	692.37	2	VIGPVCLQGVEGR	-	Rira_VGS_C160	redulysin 4a	Redulysin	687.33	2	ETIEHENYNPK	-	Rira_VGS_C1225	S1 protease 15	S1 protease
		927.42	2	LFPGDEEN*GTIM*EAGEK	N - deamidation M - oxidation	Rira_VGS_C160	redulysin 4a		509.76	2	SGLPGQTCAK	-	Rira_VGS_C1225	S1 protease 15
		685.85	2	FQSTSIQMSLTK	M - oxidation	Rira_VGS_C160	redulysin 4a		632.32	2	NVFNDVIGEEK	-	Rira_VGS_C1553	nuclease-like protein 1	Nuclease-like protein
		695.81	2	VDPLNCN*GNVCK	N - deamidation	Rira_VGS_C160	redulysin 4a		-	-	-	-	-	-
		770.33	2	EDEGHALDAVPEEE	-	Rira_VGS_C160	redulysin 4a		-	-	-	-	-	-
		926.93	2	LFPGDEENGTIM*EAGEK	M - oxidation	Rira_VGS_C160	redulysin 4a		-	-	-	-	-	-
		693.85	2	FQSTSIQM*SLTK	M - oxidation	Rira_VGS_C160	redulysin 4a		-	-	-	-	-	-
		435.27	2	VLGWGLPK	-	Rira_VGS_C447	S1 protease 8	S1 protease	-	-	-	-	-	-
		677.85	2	NAAPACLPLGNEK	-	Rira_VGS_C447	S1 protease 8		-	-	-	-	-	-
		586.32	2	YVLVAATSYGK	-	Rira_VGS_C447	S1 protease 8		-	-	-	-	-	-
		538.31	2	Q*VVHNVQIR	Q - pyroglutamination	Rira_VGS_C1028	S1 protease CUB domain 4	S1 protease CUB domain	-	-	-	-	-	-
		770.34	2	EYIDLQT*N*GHVK*	K - acetylation N - deamidation T - phosphorylation	Rira_VGS_C1028	S1 protease CUB domain 4		-	-	-	-	-	-
		546.28	2	IQLNEFGDR	-	Rira_VGS_C1028	S1 protease CUB domain 4		-	-	-	-	-	-
		643.32	2	IEEDPSLTPER	-	Rira_VGS_C2314	inositol phosphatase-like protein 1	Inositol phosphatase-like protein	-	-	-	-	-	-
		676.84	2	INDYETISIER	-	Rira_VGS_C2314	inositol phosphatase-like protein 1		-	-	-	-	-	-
		556.31	2	NTYVIFGIGK	-	Rira_VGS_C297	redulysin 8	Redulysin	-	-	-	-	-	-
		786.33	2	INMMQCEEKTCK	-	Rira_VGS_C297	redulysin 8		-	-	-	-	-	-
		549.32	2	NVISLGELPR	-	Rira_VGS_C433	S1 protease 40	S1 protease	-	-	-	-	-	-
	13	-	-	-	-	-	-		770.33	2	EDEGHALDAVPEEE	-	Rira_VGS_C160	redulysin 4a	Redulysin
		-	-	-	-	-	-		900.99	2	AVIGPFTINIGNVPTCK	-	Rira_VGS_C160	redulysin 4a
		-	-	-	-	-	-		529.75	2	FCIGYVDGK	-	Rira_VGS_C160	redulysin 4a
		-	-	-	-	-	-		685.85	2	FQSTSIQMSLTK	-	Rira_VGS_C160	redulysin 4a
		693.85	2	FQSTSIQM*SLTK	M - oxidation	Rira_VGS_C160	redulysin 4a	Redulysin	693.85	2	FQSTSIQM*SLTK	M - oxidation	Rira_VGS_C160	redulysin 4a
		-	-	-	-	-	-		750.39	2	GQAHVNFCAAALLK	-	Rira_VGS_C160	redulysin 4a
		-	-	-	-	-	-		927.42	2	LFPGDEEN*GTIM*EAGEK	N - deamidation M - oxidation	Rira_VGS_C160	redulysin 4a
		-	-	-	-	-	-		692.37	2	VIGPVCLQGVEGR	-	Rira_VGS_C160	redulysin 4a
		-	-	-	-	-	-		485.24	2	SCVDFTLK	-	Rira_VGS_C160	redulysin 4a
		-	-	-	-	-	-		445.93	3	KLAVVVGEHDIR	-	Rira_VGS_C68	S1 protease 2	S1 protease
		-	-	-	-	-	-		604.34	2	LAVVVGEHDIR	-	Rira_VGS_C68	S1 protease 2
		-	-	-	-	-	-		641.34	2	TIYSIDTNNLK	-	Rira_VGS_C68	S1 protease 2
		-	-	-	-	-	-		641.83	2	TIYSIDTN*NLK	N - deamidation	Rira_VGS_C68	S1 protease 2
		-	-	-	-	-	-		1090.03	2	CGSTDPAVN*TDVAAYLPWIK	N - deamidation	Rira_VGS_C68	S1 protease 2
		-	-	-	-	-	-		460.26	2	VM*GWGLLK	M - oxidation	Rira_VGS_C68	S1 protease 2
		-	-	-	-	-	-		753.84	2	EEDPSEYGVTPGAR	-	Rira_VGS_C566	trypsin	Trypsin
		-	-	-	-	-	-		653.84	2	ISAN*GPYSEVLR	N - deamidation	Rira_VGS_C566	trypsin
		-	-	-	-	-	-		830.39	2	EDAPAVNTDVYFYR	-	Rira_VGS_C566	trypsin
		-	-	-	-	-	-		836.94	2	YTLVGIISFGDLCSK	-	Rira_VGS_C566	trypsin
		-	-	-	-	-	-		789.38	2	GEM*ENDIAILVTEK	M - oxidation	Rira_VGS_C566	trypsin
		-	-	-	-	-	-		935.47	2	IAFNSFVTPVCFPNEK	-	Rira_VGS_C566	trypsin
		-	-	-	-	-	-		822.92	2	EASPNEYPWIVALR	-	Rira_VGS_C286	S1 protease CUB domain 1	S1 protease CUB domain
		-	-	-	-	-	-		823.41	2	EASPN*EYPWIVALR	N - deamidation	Rira_VGS_C286	S1 protease CUB domain 1
		-	-	-	-	-	-		643.85	2	TETGNQSPVLLK	-	Rira_VGS_C286	S1 protease CUB domain 1
		-	-	-	-	-	-		849.46	2	TLEPEPEVVELSINK	-	Rira_VGS_C286	S1 protease CUB domain 1
		-	-	-	-	-	-		853.45	2	LGDLPSCFSLGELLGK	-	Rira_VGS_C297	redulysin 8	Redulysin
		556.31	2	NTYVIFGIGK	-	Rira_VGS_C297	redulysin 8	Redulysin	556.31	2	NTYVIFGIGK	-	Rira_VGS_C297	redulysin 8
		-	-	-	-	-	-		693.34	2	TCISFSIPGFEK	-	Rira_VGS_C297	redulysin 8
		516.73	2	FCATYQDK	-	Rira_VGS_C297	redulysin 8	Redulysin	516.73	2	FCATYQDK	-	Rira_VGS_C297	redulysin 8
		-	-	-	-	-	-		564.27	3	DFTAHPDYYL	-	Rira_VGS_C258	trypsin	Trypsin
		-	-	-	-	-	-		488.91	3	HYEYIDLIDQR	-	Rira_VGS_C258	trypsin
		-	-	-	-	-	-		780.88	2	VNEYPM*M*AGIIYK	M - oxidation	Rira_VGS_C258	trypsin
		-	-	-	-	-	-		759.34	2	VDESDSTVYM*EVK	M - oxidation	Rira_VGS_C258	trypsin
		-	-	-	-	-	-		677.85	2	NAAPACLPLGNEK	-	Rira_VGS_C447	S1 protease 8	S1 protease
		-	-	-	-	-	-		566.28	2	TIAETDPTQR	-	Rira_VGS_C447	S1 protease 8
		-	-	-	-	-	-		660.89	2	IIYFLPWIQK	-	Rira_VGS_C447	S1 protease 8
		-	-	-	-	-	-		502.76	2	CVNAGSVIGK	-	Rira_VGS_C73	redulysin 7	Redulysin
		-	-	-	-	-	-		1082	2	NTYFTIAGEVN*GNTQFEEK	N - deamidation	Rira_VGS_C73	redulysin 7
		-	-	-	-	-	-		748.89	2	AQVNFCLGFLAEK	-	Rira_VGS_C73	redulysin 7
		-	-	-	-	-	-		552.77	2	VTPLECEEK	-	Rira_VGS_C73	redulysin 7
		-	-	-	-	-	-		643.31	2	IEEDPSLTPER	-	Rira_VGS_C2314	inositol phosphatase-like protein 1	Inositol phosphatase-like protein
		-	-	-	-	-	-		676.84	2	INDYETISIER	-	Rira_VGS_C2314	inositol phosphatase-like protein 1
		-	-	-	-	-	-		627.8	2	M*IPDTGSYNLK	-	Rira_VGS_C2314	inositol phosphatase-like protein 1
		-	-	-	-	-	-		565.28	2	IDGTNPELDR	-	Rira_VGS_C1890	S1 protease 42	S1 protease
		-	-	-	-	-	-		660.83	2	QWVFNSPEGTR	-	Rira_VGS_C1890	S1 protease 42
		-	-	-	-	-	-		561.78	2	IQLDNYGSGR	-	Rira_VGS_C1890	S1 protease 42
		-	-	-	-	-	-		676.8	2	IYDHEQYDNR	-	Rira_VGS_C686	S1 protease 6	S1 protease
		-	-	-	-	-	-		407.75	2	AGPSTIIR	-	Rira_VGS_C686	S1 protease 6
		-	-	-	-	-	-		612.31	2	SLVVTVGDYDR	-	Rira_VGS_C686	S1 protease 6
		-	-	-	-	-	-		595.31	2	TPGAYTVPVER	-	Rira_VGS_C1133	S1 protease 10	S1 protease
		-	-	-	-	-	-		732.84	2	GIQATAPSSM*PCTK	M - oxidation	Rira_VGS_C1133	S1 protease 10
		-	-	-	-	-	-		703.35	2	SPGINTDVFYHR	-	Rira_VGS_C4009	S1 protease	S1 protease
		-	-	-	-	-	-		815.91	2	YTLVGVVSYGDICGK	-	Rira_VGS_C4009	S1 protease
		-	-	-	-	-	-		664.37	2	NIGPDLTVETIR	-	Rira_VGS_C616	S1 protease 44	S1 protease
		780.89	2	M*SDRVGPICLPTAK	M - oxidation	Rira_VGS_C77	S1 protease 14	S1 protease	615.34	2	ETPVTQTINVK	-	Rira_VGS_C77	S1 protease 14
		-	-	-	-	-	-		632.32	2	NVFNDVIGEEK	-	Rira_VGS_C1553	nuclease-like protein 1
		-	-	-	-	-	-		721.9	2	LFYQAAVVSFGLK	-	Rira_VGS_C1645	S1 protease	S1 protease
		-	-	-	-	-	-		526.79	2	YTQVSLVSR	-	Rira_VGS_C1996	S1 protease 20
	14	766.36	2	DACQGDSGGPLLWR	-	Rira_VGS_C447	S1 protease 8	S1 protease	435.27	2	VLGWGLPK	-	Rira_VGS_C447	S1 protease 8	S1 protease
		658.87	2	FSILQFVTHPK	-	Rira_VGS_C447	S1 protease 8		456.57	3	YRAEEGTAVLMK	-	Rira_VGS_C447	S1 protease 8
		677.85	2	NAAPACLPLGNEK	-	Rira_VGS_C447	S1 protease 8		439.59	3	FSILQFVTHPK	-	Rira_VGS_C447	S1 protease 8
		682.03	3	SHDIAVVLLDDEIDFSVR	-	Rira_VGS_C447	S1 protease 8		549.32	2	NVISLGELPR	-	Rira_VGS_C433	S1 protease 40	S1 protease
		586.32	2	YVLVAATSYGK	-	Rira_VGS_C447	S1 protease 8		721.38	2	CIATALSSPAPPEK	-	Rira_VGS_C433	S1 protease 40
		684.35	2	YRAEEGTAVLMK	-	Rira_VGS_C447	S1 protease 8		640.85	2	ITLK*TGLLVGS*G	K - acetylation S - phosphorylation	Rira_VGS_C433	S1 protease 40
		433.91	3	YVLVAATSYGKK	-	Rira_VGS_C447	S1 protease 8		-	-	-	-	-	-
		660.89	2	IIYFLPWIQK	-	Rira_VGS_C447	S1 protease 8		-	-	-	-	-	-
		585.34	2	SILQFVTHPK	-	Rira_VGS_C447	S1 protease 8		-	-	-	-	-	-
		532.77	2	AEEGTAVLM*K	M - oxidation	Rira_VGS_C447	S1 protease 8		-	-	-	-	-	-
		450.73	2	CGVLPAVNA	-	Rira_VGS_C447	S1 protease 8		-	-	-	-	-	-
		744.02	3	DSCQGDSGGPLWLDPEINR	-	Rira_VGS_C258	trypsin	Trypsin	744.02	3	DSCQGDSGGPLWLDPEINR	-	Rira_VGS_C258	trypsin	Trypsin
		526.81	2	HDISIINLK	-	Rira_VGS_C258	trypsin		526.81	2	HDISIINLK	-	Rira_VGS_C258	trypsin
		488.91	2	HYEYIDLIDQR	-	Rira_VGS_C258	trypsin		845.41	2	Q*VIAETRPDAAM*CTK	M - oxidation Q - pyroglutamination	Rira_VGS_C258	trypsin
		751.34	2	VDESDSTVYMEVK	-	Rira_VGS_C258	trypsin		-	-	-	-	-	-
		764.88	2	VNEYPMMAGIIYK	-	Rira_VGS_C258	trypsin		-	-	-	-	-	-
		780.88	2	VNEYPM*M*AGIIYK	M - oxidation	Rira_VGS_C258	trypsin		-	-	-	-	-	-
		576.79	2	YVLAAATSYGH	-	Rira_VGS_C258	trypsin		-	-	-	-	-	-
		612.3	2	YVLAAATSYGHA	-	Rira_VGS_C258	trypsin		-	-	-	-	-	-
		558.77	2	Q*VCTYHPTK	Q - pyroglutamination	Rira_VGS_C258	trypsin		-	-	-	-	-	-
		767.88	2	FSNTIGPACMPIAR	-	Rira_VGS_C258	trypsin		-	-	-	-	-	-
		732.37	2	DMIVCGGTIITQR	-	Rira_VGS_C818	S1 protease 35	S1 protease	-	-	-	-	-	-
		740.37	2	DM*IVCGGTIITQR	M - oxidation	Rira_VGS_C818	S1 protease 35		-	-	-	-	-	-
		549.31	2	QRIPLEGER	-	Rira_VGS_C818	S1 protease 35		-	-	-	-	-	-
		540.79	2	Q*RIPLEGER	Q - pyroglutamination	Rira_VGS_C818	S1 protease 35		-	-	-	-	-	-
		816.41	2	YTLVAATSYGLNCAK	-	Rira_VGS_C818	S1 protease 35		-	-	-	-	-	-
		526.3	2	YDIAVVLMK	-	Rira_VGS_C818	S1 protease 35		-	-	-	-	-	-
		437.27	2	VLGWGLTK	-	Rira_VGS_C818	S1 protease 35		-	-	-	-	-	-
		678.35	2	FPFCGGSIITTR	-	Rira_VGS_C1645	S1 protease	S1 protease	-	-	-	-	-	-
		674.32	3	DSCQGDSGGPLVTIDKDTR	-	Rira_VGS_C1645	S1 protease		-	-	-	-	-	-
		499.26	2	TIYSIDASK	-	Rira_VGS_C1645	S1 protease		-	-	-	-	-	-
		912.47	2	EAGVNEFPFM*ALIIEK	M - oxidation	Rira_VGS_C1645	S1 protease		-	-	-	-	-	-
		488.26	2	VIDLDICK	-	Rira_VGS_C1645	S1 protease		-	-	-	-	-	-
		576.26	2	Q*ICTYNNQK	Q - pyroglutamination	Rira_VGS_C1645	S1 protease		-	-	-	-	-	-
		556.31	2	NTYVIFGIGK	-	Rira_VGS_C297	redulysin 8	Redulysin	-	-	-	-	-	-
		556.81	2	N*TYVIFGIGK	N - deamidation	Rira_VGS_C297	redulysin 8		-	-	-	-	-	-
		853.95	2	LGDLPSCFSLGELLGK	-	Rira_VGS_C297	redulysin 8		-	-	-	-	-	-
		693.35	2	TCISFSIPGFEK	-	Rira_VGS_C297	redulysin 8		-	-	-	-	-	-
		516.73	2	FCATYQDK	-	Rira_VGS_C297	redulysin 8		-	-	-	-	-	-
		968.98	2	TSQGQGN*VNFCLGLLAEK	N - deamidation	Rira_VGS_C297	redulysin 8		-	-	-	-	-	-
		546.32	2	AVNGVTLYVR	-	Rira_VGS_C1133	S1 protease 10	S1 protease	546.32	2	AVNGVTLYVR	-	Rira_VGS_C1133	S1 protease 10	S1 protease
		546.81	2	AVN*GVTLYVR	N - deamidation	Rira_VGS_C1133	S1 protease 10		704.86	2	QHILTAAHCTEK	-	Rira_VGS_C1133	S1 protease 10
		724.84	2	GIQATAPSSMPCTK	-	Rira_VGS_C1133	S1 protease 10		530.78	2	EHGVSSIFGK	-	Rira_VGS_C1133	S1 protease 10
		886.14	3	LIQHENYNTETLHNDISLLFLK	-	Rira_VGS_C1133	S1 protease 10		-	-	-	-	-	-
		919.81	3	YTIVGLVSAGPACNDVKPSVHTSVER	-	Rira_VGS_C1133	S1 protease 10		-	-	-	-	-	-
		453.25	2	CGSVIITR	-	Rira_VGS_C1133	S1 protease 10		-	-	-	-	-	-
		615.34	2	ETPVTQTINVK	-	Rira_VGS_C77	S1 protease 14		-	-	-	-	-	-
		556.94	3	RGEVNQICTFTESK	-	Rira_VGS_C77	S1 protease 14		-	-	-	-	-	-
		630.79	2	ELDPSQGVCQK	-	Rira_VGS_C77	S1 protease 14		-	-	-	-	-	-
		756.85	2	GEVNQICTFTESK	-	Rira_VGS_C77	S1 protease 14		-	-	-	-	-	-
		676.79	2	IYDHEQYDNR	-	Rira_VGS_C686	S1 protease 6		407.75	2	AGPSTIIR	-	Rira_VGS_C686	S1 protease 6	S1 protease
		590.85	2	HDISLLLLEK	-	Rira_VGS_C686	S1 protease 6		-	-	-	-	-	-
		1081.5	2	TPCQGDSGGPVVYLDPQTN*R	N - deamidation	Rira_VGS_C686	S1 protease 6		-	-	-	-	-	-
		620.26	2	YDHEQYDNR	-	Rira_VGS_C686	S1 protease 6		676.8	2	YDHEQYDNR	-	Rira_VGS_C686	S1 protease 6	S1 protease
		611.81	2	VLSETYPEER	-	Rira_VGS_C655	S1 protease 37		-	-	-	-	-	-
		599.33	2	YTLLAAPSFSK	-	Rira_VGS_C655	S1 protease 37		-	-	-	-	-	-
		676.82	2	INYDDPEVM*LK	M - oxidation	Rira_VGS_C655	S1 protease 37		-	-	-	-	-	-
		673.86	2	LWLFESPEGIR	-	Rira_VGS_C1629	S1 protease	S1 protease	-	-	-	-	-	-
		518.79	2	YAQISLVSR	-	Rira_VGS_C1629	S1 protease		-	-	-	-	-	-
		541.28	2	IINGKET*RA	T - phosphorylation	Rira_VGS_C1629	S1 protease		-	-	-	-	-	-
		735.85	2	NVSM*GEYLPTDTK	M - oxidation	Rira_VGS_C5437	venom lipase like protein	Venom lipase like protein	-	-	-	-	-	-
		591.63	3	GIYYVITNDNEPFAR	-	Rira_VGS_C5437	venom lipase like protein		-	-	-	-	-	-
		682.82	2	APEPAPQDLVK	-	Rira_VGS_C5437	venom lipase like protein		-	-	-	-	-	-
		637.34	2	IAASGLPGQTCAK	-	Rira_VGS_C1225	S1 protease 15	S1 protease	637.34	2	IAASGLPGQTCAK	-	Rira_VGS_C1225	S1 protease 15	S1 protease
		743.9	2	SYHNDVALLVLSR	-	Rira_VGS_C1225	S1 protease 15		743.9	2	SYHNDVALLVLSR	-	Rira_VGS_C1225	S1 protease 15
		687.33	2	ETIEHENYNPK	-	Rira_VGS_C1225	S1 protease 15		687.33	2	ETIEHENYNPK	-	Rira_VGS_C1225	S1 protease 15
		790.91	2	DTQILFCGGTIVTR	-	Rira_VGS_C1837	Trypsin	Trypsin	-	-	-	-	-	-
		535.29	2	VGPACLLPSR	-	Rira_VGS_C1837	Trypsin		421.26	2	QSVPLIGK	-	Rira_VGS_C5437	venom lipase like protein	Venom lipase like protein
		524.33	2	YDIAVLLLK	-	Rira_VGS_C1837	Trypsin		693.84	2	MFADFIELLCK	-	Rira_VGS_C5437	venom lipase like protein
		581.3	2	IDYNDPVAVR	-	Rira_VGS_C4265	Trypsin		533.54	4	LT*LN*KILSGT*TQVIKGIK*	T - phosphorylation N - deamidation K - acetylation	Rira_VGS_C5326	cysteine proteinase inhibitor 5	Cyteine proteinase inhibitor
		730.4	2	YILVAAPSYATYK	-	Rira_VGS_C4265	Trypsin		643.32	2	IEEDPSLTPER	-	Rira_VGS_C2314	inositol phosphatase-like protein 1	Insitol phosphatase-like protein
		518.79	2	YAQISLVSR	-	Rira_VGS_C516	S1 protease		660.9	4	K*LLFALLLISPSVIFGQSVK*NVK*	K - acetylation	Rira_VGS_C516	S1 protease	S1 protease
		588.84	2	LTQVAVVSFGR	-	Rira_VGS_C539	S1 protease 7		611.82	4	RGSLSVYLLSPSGTVSYMLEER	-	Rira_VGS_C3142	Neuroendicrine convertase 1 like.	Neroendicrine convertase 1 like
	15	636.89	2	IVLSCVILISR	-	Rira_VGS_C539	S1 protease 7	S1 protease	636.89	2	IVLSCVILISR	-	Rira_VGS_C539	S1 protease 7	S1 protease
		559.56	4	EAAVNEYPFAVLIMLKTRK*	K - acetylation	Rira_VGS_C539	S1 protease 7		614.31	2	AIEHPNYVER	-	Rira_VGS_C539	S1 protease 7
		-	-	-	-	-	-		613.33	2	LSVIVGEHDTR	-	Rira_VGS_C539	S1 protease 7
		-	-	-	-	-	-	S1 protease	702.32	2	TYCGEGVDYALR	-	Rira_VGS_C539	S1 protease 7
		437.26	3	VFVTKPYTNLK	-	Rira_VGS_C539	S1 protease 7		605.85	2	FVTKPYTNLK	-	Rira_VGS_C539	S1 protease 7
		-	-	-	-	-	-		754.3	2	YDEIDS*SEDGLGK	S - phosphorylation	Rira_VGS_C539	S1 protease 7
		-	-	-	-	-	-		740.82	2	EIDS*SEHGLGTGAK	S - phosphorylation	Rira_VGS_C287	S1 protease	S1 protease
		-	-	-	-	-	-		650.85	2	FAVVIGEHDVSK	-	Rira_VGS_C287	S1 protease
		-	-	-	-	-	-		830.96	2	ETLPNEYPFPVILK	-	Rira_VGS_C287	S1 protease
		-	-	-	-	-	-		451.27	2	GTSSPVLLK	-	Rira_VGS_C287	S1 protease
		-	-	-	-	-	-		619.87	2	LINLIPQTGGGR	-	Rira_VGS_C68	S1 protease 2	S1 protease
		-	-	-	-	-	-		641.34	2	TIYSIDTNNLK	-	Rira_VGS_C68	S1 protease 2
		-	-	-	-	-	-		641.83	2	TIYSIDTNN*LK	N - deamidation	Rira_VGS_C68	S1 protease 2
		-	-	-	-	-	-		480.25	2	VIDPEVCK	-	Rira_VGS_C68	S1 protease 2
		-	-	-	-	-	-		581.3	2	IDYNDPVAVR	-	Rira_VGS_C4265	trypsin	Trypsin
		-	-	-	-	-	-		590.79	2	VISDTYPEEK	-	Rira_VGS_C4265	trypsin
		-	-	-	-	-	-		730.4	2	YILVAAPSYATYK	-	Rira_VGS_C4265	trypsin
		-	-	-	-	-	-		613.84	2	IIGPACLPTER	-	Rira_VGS_C4265	trypsin
		853.45	2	LGDLPSCFSLGELLGK	-	Rira_VGS_C297	redulysin 8	Redulysin	556.31	2	NTYVIFGIGK	-	Rira_VGS_C297	redulysin 8	Redulysin
		693.35	2	TCISFSIPGFEK	-	Rira_VGS_C297	redulysin 8		693.35	2	TCISFSIPGFEK	-	Rira_VGS_C297	redulysin 8
		-	-	-	-	-	-		472.74	2	EGSPAVEQK	-	Rira_VGS_C297	redulysin 8
		-	-	-	-	-	-		908.98	2	VAGWFITPDGPGSDVLK	-	Rira_VGS_C1994	trypsin	Trypsin
		-	-	-	-	-	-		620.83	2	YTLVAAPSYGAK	-	Rira_VGS_C1994	trypsin
		-	-	-	-	-	-		849.91	2	GDSGGPILWVDPDTNR	-	Rira_VGS_C1994	trypsin
		-	-	-	-	-	-		687.33	2	ETIEHENYNPK	-	Rira_VGS_C1225	trypsin
		-	-	-	-	-	-		637.34	2	IAASGLPGQTCAK	-	Rira_VGS_C1225	trypsin
		694.35	2	TSIYNEM*SVSIK	M - oxidation	Rira_VGS_C1255	S1 protease 5	S1 protease	630.79	2	ESSPEPVEVCK	-	Rira_VGS_C1255	S1 protease 5	S1 protease
	16	617.3	4	AFPCFDEPAMKAK*FSIELGHK	K - acetylation	Rira_VGS_C6996	aminopeptidase	Aminopeptidase	849.45	2	KGSAIIHMMHQFLGK	-	Rira_VGS_C6996	aminopeptidase	Aminopeptidase
		1114.54	2	EIWILNRYLEWS*LDQK*	S - phosphorylation K - acetylation	Rira_VGS_C6996	aminopeptidase		565.32	2	AKFSIELGHK	-	Rira_VGS_C6996	aminopeptidase
		635.31	4	EK*LMIGMPTYGRS*FTLVDETK	S - phosphorylation K - acetylation	Rira_VGS_C2119	chitinase 3	Chitinase	600.34	4	EKLIIGMPTYGRTFTLTSIQK	-	Rira_VGS_C2119	chitinase 3	Chitinase
		764.82	2	Q*LSVS*AAAEM*WT*R	S - phosphorylation M - oxidation Q - pyroglutamination	Rira_VGS_C2119	chitinase 3		619.87	2	LINLIPQTGGGR	-	Rira_VGS_C68	S1 protease 2	S1 protease
		-	-	-	-	-	-		549.78	2	FDLYAPTGSK	-	Rira_VGS_C68	S1 protease 2	S1 protease
		-	-	-	-	-	-		641.34	2	TIYSIDTNNLK	-	Rira_VGS_C68	S1 protease 2
		-	-	-	-	-	-		480.25	2	VIDPEVCK	-	Rira_VGS_C68	S1 protease 2
		-	-	-	-	-	-		1275.21	2	IVGGVEAGVNEYPFPILLIFASSR	-	Rira_VGS_C68	S1 protease 2
		-	-	-	-	-	-		760.86	2	IYQHPGYADTNNK	-	Rira_VGS_C68	S1 protease 2
		-	-	-	-	-	-		462.75	2	VVGEHDIR	-	Rira_VGS_C68	S1 protease 2
		-	-	-	-	-	-		727.03	3	CGSTDPAVN*TDVAAYLPWIK	-	Rira_VGS_C68	S1 protease 2
		-	-	-	-	-	-		556.31	2	NTYVIFGIGK	-	Rira_VGS_C297	redulysin 8	Redulysin
		-	-	-	-	-	-		472.74	2	EGSPAVEQK	-	Rira_VGS_C297	redulysin 8
		-	-	-	-	-	-		853.45	2	LGDLPSCFSLGELLGK	-	Rira_VGS_C297	redulysin 8
	17	730.4	2	IISQSAPLETCIK	-	Rira_VGS_C16	S1 protease CUB domain 3	S1 protease CUB domain	1087.07	2	IVNGDNVEEGQYPWIVALR	-	Rira_VGS_C16	S1 protease CUB domain 3	S1 protease CUB domain
		618.79	2	IFEHDYEAGR	-	Rira_VGS_C16	S1 protease CUB domain 3		1087.55	2	IVN*GDNVEEGQYPWIVALR	N - deamidation	Rira_VGS_C16	S1 protease CUB domain 3
		723.9	2	SVSNTLSVVLQSGR	-	Rira_VGS_C16	S1 protease CUB domain 3		526.74	2	SFDTTNPDR	-	Rira_VGS_C16	S1 protease CUB domain 3
		446.73	2	FVTSPDAR	-	Rira_VGS_C16	S1 protease CUB domain 3		618.79	2	IFEHDYEAGr	-	Rira_VGS_C16	S1 protease CUB domain 3
		-	-	-	-	-	-		720.84	2	M*TWNFVTSPDAR	M - oxidation	Rira_VGS_C16	S1 protease CUB domain 3
		-	-	-	-	-	-		723.9	2	SVSNTLSVVLQSGR	-	Rira_VGS_C16	S1 protease CUB domain 3
		-	-	-	-	-	-		626.85	2	YIQVALVSFGR	-	Rira_VGS_C16	S1 protease CUB domain 3
		-	-	-	-	-	-		561.96	3	LHLNDVAVM*WLNDK	M - oxidation	Rira_VGS_C16	S1 protease CUB domain 3
		-	-	-	-	-	-		730.4	2	IISQSAPLETCIK	-	Rira_VGS_C16	S1 protease CUB domain 3
		-	-	-	-	-	-		562.25	2	FEHDYEAGR	-	Rira_VGS_C16	S1 protease CUB domain 3
		-	-	-	-	-	-		721.9	2	LFYQAAVVSFGLK	-	Rira_VGS_C1645	S1 protease	S1 protease
		-	-	-	-	-	-		662.88	2	NVLLRPQTGNGR	-	Rira_VGS_C1645	S1 protease
		-	-	-	-	-	-		678.35	2	FPFCGGSIITTR	-	Rira_VGS_C1645	S1 protease
		-	-	-	-	-	-		556.82	2	LLRPQTGN*GR	N - deamidation	Rira_VGS_C1645	S1 protease
		-	-	-	-	-	-		499.26	2	TIYSIDASK	-	Rira_VGS_C1645	S1 protease
		-	-	-	-	-	-		674.32	3	DSCQGDSGGPLVTIDKDTR	-	Rira_VGS_C1645	S1 protease
		-	-	-	-	-	-		824.88	2	DSCQGDSGGPLVTIDK	-	Rira_VGS_C1645	S1 protease
		-	-	-	-	-	-		490.77	2	FM*ALIIEK	M - oxidation	Rira_VGS_C1645	S1 protease
		-	-	-	-	-	-		849.91	2	GDSGGPLVWLDPDTNR	-	Rira_VGS_C1187	S1 protease CUB domain 16	S1 protease CUB domain
		-	-	-	-	-	-		646.35	2	DFDIAILSLER	-	Rira_VGS_C1187	S1 protease CUB domain 16
		916.08	3	GNPTGDTYSVLVGEHDWQADNNEAR	-	Rira_VGS_C1187	S1 protease CUB domain 16	S1 protease CUB domain	916.08	3	GNPTGDTYSVLVGEHDWQADNNEAR	-	Rira_VGS_C1187	S1 protease CUB domain 16
		-	-	-	-	-	-		753.42	2	ITDFDIAILSLER	-	Rira_VGS_C1187	S1 protease CUB domain 16
		-	-	-	-	-	-		714.69	3	SDLHEDITWIFDTQPPAR	-	Rira_VGS_C1187	S1 protease CUB domain 16
		673.32	2	VNDEGYYSTVAK	.	Rira_VGS_C1187	S1 protease CUB domain 16	S1 protease CUB domain	673.32	2	VNDEGYYSTVAK	-	Rira_VGS_C1187	S1 protease CUB domain 16
		509.27	2	YTQVALVSH	-	Rira_VGS_C1187	S1 protease CUB domain 16		509.27	2	YTQVALVSH	-	Rira_VGS_C1187	S1 protease CUB domain 16
		-	-	-	-	-	-		738.36	2	YVTVNLTPGHDPY	-	Rira_VGS_C1187	S1 protease CUB domain 16
		-	-	-	-	-	-		716.34	2	EGGWVNPEQLM*R	M - oxidation	Rira_VGS_C1701	S1 protease CUB domain 3
		-	-	-	-	-	-		633.81	2	VWSFETTPGSR	-	Rira_VGS_C1701	S1 protease CUB domain 3
		-	-	-	-	-	-		612.84	2	FTQIGLVSFGR	-	Rira_VGS_C1701	S1 protease CUB domain 3
		-	-	-	-	-	-		557.31	2	IGPVCLTPTR	-	Rira_VGS_C1701	S1 protease CUB domain 3
		-	-	-	-	-	-		1008.99	2	TNCFVQAVTGDIPFQYR	-	Rira_VGS_C1701	S1 protease CUB domain 3
		-	-	-	-	-	-		561.21	2	EVDS*SEYGR	S - phosphorylation	Rira_VGS_C1701	S1 protease CUB domain 3
		-	-	-	-	-	-		577.79	2	Q*IINHNYNR	Q - pyroglutamination	Rira_VGS_C1701	S1 protease CUB domain 3
		619.87	2	LINLIPQTGGGR	-	Rira_VGS_C68	S1 protease 2	S1 protease	619.87	2	LINLIPQTGGGR	-	Rira_VGS_C68	S1 protease 2	S1 protease
		549.78	2	FDLYAPTGSK	-	Rira_VGS_C68	S1 protease 2		549.78	2	FDLYAPTGSK	-	Rira_VGS_C68	S1 protease 2
		-	-	-	-	-	-		850.45	3	IVGGVEAGVN*EYPFPILLIFASSR	N - deamidation	Rira_VGS_C68	S1 protease 2
		-	-	-	-	-	-		638.34	2	DDISILELETK	-	Rira_VGS_C68	S1 protease 2
		-	-	-	-	-	-		445.93	3	KLAVVVGEHDIR	-	Rira_VGS_C68	S1 protease 2
		641.34	2	TIYSIDTNNLK	-	Rira_VGS_C68	S1 protease 2	S1 protease	641.34	2	TIYSIDTNNLK	-	Rira_VGS_C68	S1 protease 2
		498.27	2	VNDIIM*FK	M - oxidation	Rira_VGS_C2803	S1 protease CUB domain 18	S1 protease CUB domain	646.35	2	DFDIAILSLER	-	Rira_VGS_C2803	S1 protease CUB domain 18	S1 protease CUB domain
		849.42	2	GDSGGPLVWVNPETNR	-	Rira_VGS_C2803	S1 protease CUB domain 18		849.42	2	GDSGGPLVWVNPETNR	-	Rira_VGS_C2803	S1 protease CUB domain 18
		580.81	2	TVNIQICNAK	-	Rira_VGS_C2803	S1 protease CUB domain 18		627.66	3	QHEYPWLVALVSGPER	-	Rira_VGS_C2803	S1 protease CUB domain 18
		665.32	2	VNDEGYYSTVAK	-	Rira_VGS_C2803	S1 protease CUB domain 18		665.32	2	VNDEGYFSTVAK	-	Rira_VGS_C2803	S1 protease CUB domain 18
		-	-	-	-	-	-		509.27	2	YTQVALVSH	-	Rira_VGS_C2803	S1 protease CUB domain 18
		-	-	-	-	-	-		852.45	2	LGDLPSCFSLGELLGK	-	Rira_VGS_C297	redulysin 8	Redulysin
		-	-	-	-	-	-		693.35	2	TCISFSIPGFEK	-	Rira_VGS_C297	redulysin 8
		-	-	-	-	-	-		590.3	2	YGDDK*EK*LK	K - acetylation	Rira_VGS_C297	redulysin 8
		-	-	-	-	-	-		516.73	2	FCATYQDK	-	Rira_VGS_C297	redulysin 8
		-	-	-	-	-	-		556.31	2	NTYVIFGIGK	-	Rira_VGS_C297	redulysin 8
		-	-	-	-	-	-		649.32	2	WEFITEPGYR	-	Rira_VGS_C1321	S1 protease 2	S1 protease
		-	-	-	-	-	-		793.77	3	LRPGETIYEAINLTPIPHSEK	-	Rira_VGS_C1321	S1 protease 2
		-	-	-	-	-	-		741.34	2	WPSNPPTHVCTW	-	Rira_VGS_C1321	S1 protease 2
		-	-	-	-	-	-		537.8	2	EPGYRIGIK*	K - acetylation	Rira_VGS_C1321	S1 protease 2
		-	-	-	-	-	-		706.86	2	MS*LIERLIVAST	S - phosphorylation	Rira_VGS_C1321	S1 protease 2
		770.33	2	EDEGHALDAVPEEE	-	Rira_VGS_C160	redulysin 4a	Redulysin	770.33	2	EDEGHALDAVPEEE	-	Rira_VGS_C160	redulysin 4a	Redulysin
		-	-	-	-	-	-		692.37	2	VIGPVCLQGVEGR	-	Rira_VGS_C160	redulysin 4a
		-	-	-	-	-	-		485.24	2	SCVDFTLK	-	Rira_VGS_C160	redulysin 4a
		-	-	-	-	-	-		693.85	2	FQSTSIQM*SLTK	M - oxidation	Rira_VGS_C160	redulysin 4a
		-	-	-	-	-	-		728.89	2	LYEPPVDIQNLR	-	Rira_VGS_C893	S1 protease CUB domain 8	S1 protease CUB domain
		-	-	-	-	-	-		835.89	2	GDSGGPAVWLDPETNR	-	Rira_VGS_C893	S1 protease CUB domain 8
		-	-	-	-	-	-		667.85	2	TALTEDTSEVLR	-	Rira_VGS_C893	S1 protease CUB domain 8
		-	-	-	-	-	-		779.39	2	VEAIGWGAIAADEAGK	-	Rira_VGS_C2945	S1 protease CUB domain 14
		-	-	-	-	-	-		554.79	2	M*ELTIQTTR	M - oxidation	Rira_VGS_C2945	S1 protease CUB domain 14
		673.86	2	LWLFESPEGIR	-	Rira_VGS_C1629	S1 protease	S1 protease	673.86	2	LWLFESPEGIR	-	Rira_VGS_C1629	S1 protease	S1 protease
		518.79	2	YAQLSLVSR	-	Rira_VGS_C1629	S1 protease		518.79	2	YQALSLVSR	-	Rira_VGS_C1629	S1 protease
		548.32	2	NVISLGELPR	-	Rira_VGS_C433	S1 protease 40	S1 protease	566.28	2	TIAETDPTQR	-	Rira_VGS_C447	S1 protease 8
		479.79	2	WALK*TAKV	K - acetylation	Rira_VGS_C433	S1 protease 40		660.89	2	IIYFLPWIQK	-	Rira_VGS_C447	S1 protease 8
		637.29	2	Q*CDDIRINSK*	K - acetylation Q - pyroglutamination	Rira_VGS_C433	S1 protease 40		561.78	2	IQLDNYGSGR	-	Rira_VGS_C1890	S1 protease 42	S1 protease
		-	-	-	-	-	-		661.31	2	QWVFN*SPEGTR	N - deamidation	Rira_VGS_C1890	S1 protease 42
		-	-	-	-	-	-		849.91	2	GDSGGPLVWLDPDTNR	-	Rira_VGS_C1996	S1 protease 20	S1 protease
		-	-	-	-	-	-		526.79	2	YTQVSLVSR	-	Rira_VGS_C1996	S1 protease 20
		-	-	-	-	-	-
		-	-	-	-	-	-		524.27	2	FQTGPTPSGR	-	Rira_VGS_C4742	S1 protease CUB domain 19	S1 protease CUB domain
		-	-	-	-	-	-		683.35	2	VENVAITAEEYK	-	Rira_VGS_C4742	S1 protease CUB domain 19
		-	-	-	-	-	-		695.36	4	IEGLAGYASMLTEKLT*NFIISWIK	T - phosphorylation	Rira_VGS_C12
		664.37	2	NIGDPLTVETIR	-	Rira_VGS_C616	S1 protease 44	S1 protease	664.37	2	NIGDPLTVETIR	-	Rira_VGS_C616	S1 protease 44	S1 protease
		-	-	-	-	-	-		561.32	2	SNVFDISVLK	-	Rira_VGS_C1255	S1 protease 5
		667.85	2	TALTEDTSEVLR	-	Rira_VGS_C893	S1 protease CUB domain 8	S1 protease CUB domain	950.8	3	NPYNPNPSALHEDITWIIDTQSPAR	-	Rira_VGS_C2804
		649.32	2	WEFITEPGYR	-	Rira_VGS_C1321	S1 protease 2	S1 protease	599.31	2	IFVGDQYLDK	-	Rira_VGS_C9523
	18	839.92	2	ETGINEYPWMVAIR	-	Rira_VGS_C628	S1 protease CUB domain 6	S1 protease CUB domain	-	-	-	-	-	-
		775.4	2	TLCGSQSDLQIISK	-	Rira_VGS_C628	S1 protease CUB domain 6		-	-	-	-	-	-
		603.84	2	VFSVTELQVK	-	Rira_VGS_C628	S1 protease CUB domain 6		-	-	-	-	-	-
		550.29	2	VGPICLSPEK	-	Rira_VGS_C628	S1 protease CUB domain 6		-	-	-	-	-	-
		761.69	3	LSEASPCKDYLSIDDGNEIR	-	Rira_VGS_C628	S1 protease CUB domain 6		-	-	-	-	-	-
		507.31	2	LWFPIIPK	-	Rira_VGS_C628	S1 protease CUB domain 6		-	-	-	-	-	-
		721.38	2	CIATALSSPAPPEK	-	Rira_VGS_C433	S1 protease 40	S1 protease	-	-	-	-	-	-
		549.32	2	NVISLGELPR	-	Rira_VGS_C433	S1 protease 40		549.32	2	NVISLGELPR	-	Rira_VGS_C433	S1 protease 40	S1 protease
		512.29	2	ASHAQRVVR	-	Rira_VGS_C433	S1 protease 40		-	-	-	-	-	-
		718.34	2	DDGKLM*VSAGDSPK	M - oxidation	Rira_VGS_C433	S1 protease 40		-	-	-	-	-	-
		664.37	2	NIGDPLTVETIR	-	Rira_VGS_C616	S1 protease 44		-	-	-	-	-	-
		839.45	2	IGSTANGVLLFNCIAK	-	Rira_VGS_C616	S1 protease 44		-	-	-	-	-	-
		839.94	2	IGSTAN*GVLLFNCIAK	N - deamidation	Rira_VGS_C616	S1 protease 44		-	-	-	-	-	-
		487.74	2	LEFDHTGR	-	Rira_VGS_C616	S1 protease 44		-	-	-	-	-	-
		730.4	2	IISQSAPLETCIK	-	Rira_VGS_C16	S1 protease CUB domain 3	S1 protease CUB domain	-	-	-	-	-	-
		747.39	4	ICGLKYNILVDK*SVS*NTLSVVLQSGR	K - acetylation S - phosphorylation	Rira_VGS_C16	S1 protease CUB domain 3		-	-	-	-	-	-
		526.74	2	SFDTTNPDR	-	Rira_VGS_C16	S1 protease CUB domain 3		-	-	-	-	-	-
		518.79	2	YAQLSLVSR	-	Rira_VGS_C516	S1 protease	S1 protease	-	-	-	-	-	-
		624.31	2	ISNPQYPGDTR	-	Rira_VGS_C516	S1 protease		-	-	-	-	-	-
		467.75	2	N*IEM*ILGK	N - deamidation M - oxidation	Rira_VGS_C516	S1 protease		-	-	-	-	-	-
		916.08	3	GNPTGDTYSVLVGEHDWQADNNEAR	-	Rira_VGS_C1187	S1 protease CUB domain 16	S1 protease CUB domain	-	-	-	-	-	-
		850.42	2	GDSGGPLVWLDPDTNR	-	Rira_VGS_C1187	S1 protease CUB domain 16		-	-	-	-	-	-
		673.32	2	VNDEGYYSTVAK	-	Rira_VGS_C1187	S1 protease CUB domain 16		-	-	-	-	-	-
		660.83	2	QWVFNSPEGTR	-	Rira_VGS_C1890	S1 protease 42	S1 protease	-	-	-	-	-	-
		652.31	2	Q*WVFNSPEGTR	Q - pyroglutamination	Rira_VGS_C1890	S1 protease 42		-	-	-	-	-	-
		561.78	2	IQLDNYGSGR	-	Rira_VGS_C1890	S1 protease 42		-	-	-	-	-	-
		549.78	2	FDLYAPTGSK	-	Rira_VGS_C68	S1 protease 2		-	-	-	-	-	-
		641.34	2	TIYSIDTNNLK	-	Rira_VGS_C68	S1 protease 2		-	-	-	-	-	-
		627.35	2	NIGDPAPTEVIK	-	Rira_VGS_C167	trypsin precursor	Trypsin precursor		-	-	-	-	-
		666.86	2	LWLFESPEGVR	-	Rira_VGS_C167	trypsin precursor		-	-	-	-	-	-
		729.4	2	LYEPPVDIQNLR	-	Rira_VGS_C893	S1 protease CUB domain 8	S1 protease CUB domain	-	-	-	-	-	-
		659.81	2	SDDGYIHINER	-	Rira_VGS_C893	S1 protease CUB domain 8		-	-	-	-	-	-
		557.31	2	IGPVCLTPTR	-	Rira_VGS_C1701	S1 protease CUB domain 3		716.34	2	EGGWVNPEQLM*R	M - oxidation	Rira_VGS_C1701	S1 protease CUB domain 3	S1 protease CUB domain
		633.81	2	VWSFETTPGSR	-	Rira_VGS_C1701	S1 protease CUB domain 3		561.21	2	EVDSS*EYGR	S - phosphorylation	Rira_VGS_C1701	S1 protease CUB domain 3
		526.81	2	HDISIINLK	-	Rira_VGS_C258	trypsin	Trypsin	-	-	-	-	-	-
		556.31	2	NTYVIFGIGK	-	Rira_VGS_C297	redulysin 8	Redulysin	-	-	-	-	-	-
		678.35	2	FPFCGGSIITTR	-	Rira_VGS_C1645	S1 protease	S1 protease	-	-	-	-	-	-
		849.42	2	GDSGGPLVWVNPETNR	-	Rira_VGS_C2803	S1 protease CUB domain 18	S1 protease CUB domain	849.42	2	GDSGGPLVWVNPETNR	-	Rira_VGS_C2803	S1 protease CUB domain 18	S1 protease CUB domain
		607.82	2	FVSTSAGSGFVR	-	Rira_VGS_C25511			629.37	2	VWLLKSTPGTR	-	Rira_VGS_C25511
	19	624.31	2	ISNPQYPGDTR	-	Rira_VGS_C517	S1 protease	S1 Protease	747.39	2	HIITAAHCVSISGK	-	Rira_VGS_C517	S1 protease	S1 protease
		675.33	2	TISN*PQYPGDTR	N - deamidation	Rira_VGS_C517	S1 protease		613.79	2	ISFQCDTSLR	-	Rira_VGS_C517	S1 protease
		-	-	-	-	-	-		862.9	2	TFCSGDSGGPVVWLDK	-	Rira_VGS_C517	S1 protease
		-	-	-	-	-	-		788.93	2	VAFFYGYLQEVIK	-	Rira_VGS_C517	S1 protease
		-	-	-	-	-	-		533.8	2	YTQLSLVSR	-	Rira_VGS_C517	S1 protease
		782.87	2	QAMIMGWGVTEEGR	.	Rira_VGS_C517	S1 protease	S1 protease	782.87	2	QAMIMGWGVTEEGR	.	Rira_VGS_C517	S1 protease
		790.87	2	QAM*IMGWGVTEEGR	M - oxidation	Rira_VGS_C517	S1 protease		674.83	2	TISNPQYPGDTR	-	Rira_VGS_C517	S1 protease
		-	-	-	-	-	-		526.76	2	VM*DLTVCAK	M - oxidation	Rira_VGS_C517	S1 protease
		-	-	-	-	-	-		923.82	3	QTIEFNNIIGPICIEPTELPVTN*R	N - deamidation	Rira_VGS_C517	S1 protease
		-	-	-	-	-	-		807.42	2	VNEFPWMVHLSVR	-	Rira_VGS_C517	S1 protease
		-	-	-	-	-	-		763.39	2	GLDYHDFAVIFTK	-	Rira_VGS_C517	S1 protease
		-	-	-	-	-	-		679.33	2	ETEPSVATCHKV		Rira_VGS_C517	S1 protease
		624.31	2	ISNPQYPGDTR	-	Rira_VGS_C516	S1 protease	S1 protease	518.79	2	YAQLSLVSR	-	Rira_VGS_C516	S1 protease
		675.33	2	TISN*PQYPGDTR	N - deamidation	Rira_VGS_C516	S1 protease		747.39	2	HIITAAHCVSISGK	-	Rira_VGS_C516	S1 protease
		-	-	-	-	-	-		733.4	2	GLAFHDFAVIFTK	-	Rira_VGS_C516	S1 protease
		-	-	-	-	-	-		636.81	2	ISFQCDLSFR	-	Rira_VGS_C516	S1 protease
		-	-	-	-	-	-		1073.48	2	FESDEGSFDATCGASIVTPR	-	Rira_VGS_C516	S1 protease
		-	-	-	-	-	-		675.33	2	TISNPEYPGDTR	-	Rira_VGS_C516	S1 protease
		-	-	-	-	-	-		804.91	2	VSYFYGYLQEVIK	-	Rira_VGS_C516	S1 protease
		-	-	-	-	-	-		807.42	2	VNEFPWMVHLSVR	-	Rira_VGS_C516	S1 protease
		-	-	-	-	-	-		679.33	2	ETEPSVATCHKV	-	Rira_VGS_C516	S1 protease
		-	-	-	-	-	-		690.32	2	Q*AM*IM*GWGLTEK	Q - pyroglutamination M - oxidation	Rira_VGS_C516	S1 protease
		-	-	-	-	-	-		493.77	2	EPIPFLDR	-	Rira_VGS_C516	S1 protease
		-	-	-	-	-	-		1008.99	2	TNCFVQAVTGDIPFQYR	-	Rira_VGS_C1701	S1 protease CUB domain 3	S1 protease CUB domain
		-	-	-	-	-	-		1111.5	2	DSCFGDSGGPLVWLDPETNR	-	Rira_VGS_C1701	S1 protease CUB domain 3
		-	-	-	-	-	-		612.84	2	FTQIGLVSFGR	-	Rira_VGS_C1701	S1 protease CUB domain 3
		-	-	-	-	-	-		1041.03	2	GQEVPIESPGYPEVPPAGTR	-	Rira_VGS_C1701	S1 protease CUB domain 3
		-	-	-	-	-	-		528.22	2	M*FDTSAPDR	M - oxidation	Rira_VGS_C1701	S1 protease CUB domain 3
		-	-	-	-	-	-		902.77	3	VNSNVAHFYDWIQSTVAYTHPGAK	-	Rira_VGS_C1701	S1 protease CUB domain 3
		-	-	-	-	-	-		633.81	2	VWSFETTPGSR	-	Rira_VGS_C1701	S1 protease CUB domain 3
		557.31	2	IGPVCLTPTR	-	Rira_VGS_C1701	S1 protease CUB domain 3	S1 Protease CUB Domain	557.31	2	IGPVCLTPTR	-	Rira_VGS_C1701	S1 protease CUB domain 3
		-	-	-	-	-	-		520.23	2	MFDTSAPDR	-	Rira_VGS_C1701	S1 protease CUB domain 3
		-	-	-	-	-	-		690.84	2	PGKPGYDQIYDK	-	Rira_VGS_C1701	S1 protease CUB domain 3
		-	-	-	-	-	-		854.89	2	VVDYNACSYLWYR	-	Rira_VGS_C1701	S1 protease CUB domain 3
		847.92	2	ETGINEYPWM*VAIR	M - oxidation	Rira_VGS_C628	S1 protease CUB domain 6	S1 Protease CUB Domain	518.79	2	YAQLSLVSR	-	Rira_VGS_C622	S1 protease	S1 protease
		-	-	-	-	-	-		747.39	2	HIITAAHCVSISGK	-	Rira_VGS_C622	S1 protease
		-	-	-	-	-	-		636.81	2	ISFQCDLSFR	-	Rira_VGS_C622	S1 protease
		-	-	-	-	-	-		675.33	2	TISNPEYPGDTR	-	Rira_VGS_C622	S1 protease
		-	-	-	-	-	-		723.38	2	EVTVNAENVFVPK	-	Rira_VGS_C622	S1 protease
		-	-	-	-	-	-		923.82	3	QTIEFNNIIGPICIEPTELPVTN*R	N - deamidation	Rira_VGS_C622	S1 protease
		-	-	-	-	-	-		679.33	2	ETEPSVATCHKV	-	Rira_VGS_C622	S1 protease
		-	-	-	-	-	-		690.32	2	Q*AM*IM*GWGLTEK	Q - pyroglutamination M - oxidation	Rira_VGS_C622	S1 protease
		-	-	-	-	-	-		840.45	2	IGSTAN*GVLLFNCIAK	N - deamidation	Rira_VGS_C616	S1 protease 44	S1 protease
		-	-	-	-	-	-		487.74	2	LEFDHTGR	-	Rira_VGS_C616	S1 protease 44
		-	-	-	-	-	-		782.36	2	TIEWNFEADPGER	-	Rira_VGS_C616	S1 protease 44
		-	-	-	-	-	-		961.81	3	IVDGETEPIPHFDQMWVFESPPGVR	-	Rira_VGS_C616	S1 protease 44
		-	-	-	-	-	-		967.14	3	IVDGETEPIPHFDQM*WVFESPPGVR	M - oxidation	Rira_VGS_C616	S1 protease 44
		-	-	-	-	-	-		664.37	2	NIGDPLTVETIR	-	Rira_VGS_C616	S1 protease 44
		-	-	-	-	-	-		526.79	2	YTQVSLVSR	-	Rira_VGS_C1996	S1 protease 20	S1 protease
		-	-	-	-	-	-		485.28	2	EELPVINR	-	Rira_VGS_C1996	S1 protease 20
		-	-	-	-	-	-		784.33	2	EVDS*SEHGVTQGSR	S - phosphorylation	Rira_VGS_C1996	S1 protease 20
		-	-	-	-	-	-		801.92	2	IAFNDVIGPVCLER	-	Rira_VGS_C1996	S1 protease 20
		-	-	-	-	-	-		702.37	2	IIIMGWGLTEDR	-	Rira_VGS_C1996	S1 protease 20
		-	-	-	-	-	-		735.82	2	IEYNFVAN*GDN*GR	N - deamidation	Rira_VGS_C1996	S1 protease 20
		800.92	2	AIESPAYPDIPAAGTK	-	Rira_VGS_C16	S1 protease CUB domain 3	S1 Protease CUB Domain	800.92	2	AIESPAYPDIPAAGTK	-	Rira_VGS_C16	S1 protease CUB domain 3	S1 protease CUB domain
		526.74	2	SFDTTNPDR	-	Rira_VGS_C16	S1 protease CUB domain 3		518.76	2	LELGGAAYDK	-	Rira_VGS_C16	S1 protease CUB domain 3
		584.79	2	FCGSESGLAIK	-	Rira_VGS_C16	S1 protease CUB domain 3		446.73	2	FVTSPDAR	-	Rira_VGS_C16	S1 protease CUB domain 3
		-	-	-	-	-	-		594.3	2	GYFLVFDGNR	-	Rira_VGS_C16	S1 protease CUB domain 3
		-	-	-	-	-	-		517.8	2	K*YNILVDK	K - acetylation	Rira_VGS_C16	S1 protease CUB domain 3
		630.77	2	M*SFQCDTSLR	M - oxidation	Rira_VGS_C546	S1 protease	S1 protease	630.77	2	M*SFQCDTSLR	M - oxidation	Rira_VGS_C546	S1 protease	S1 protease
		501.78	2	IINGTETRV	-	Rira_VGS_C546	S1 protease		768.4	2	VNEFPWM*VALSVK	M - oxidation	Rira_VGS_C546	S1 protease
		452.74	2	IIN*GTETR	N - deamidation	Rira_VGS_C546	S1 protease		777.88	2	AIIM*GWGLTEEYR	M - oxidation	Rira_VGS_C546	S1 protease
		-	-	-	-	-	-		474.25	3	HVLTAAHCVVSAR	-	Rira_VGS_C546	S1 protease
		-	-	-	-	-	-		515.3	3	KVEKPENVAVVFGK	-	Rira_VGS_C546	S1 protease
		-	-	-	-	-	-		705.33	2	DYLSIDDGNEIR	-	Rira_VGS_C628	S1 protease CUB domain 6	S1 protease CUB domain
		-	-	-	-	-	-		839.92	2	ETGINEYPWMVAIR	-	Rira_VGS_C628	S1 protease CUB domain 6
		-	-	-	-	-	-		775.4	2	TLCGSQSDLQIISK	-	Rira_VGS_C628	S1 protease CUB domain 6
		-	-	-	-	-	-		548.27	2	VALTCNDFR	-	Rira_VGS_C628	S1 protease CUB domain 6
		-	-	-	-	-	-		603.84	2	VFSVGTELQVK	-	Rira_VGS_C628	S1 protease CUB domain 6
		-	-	-	-	-	-		701.38	2	FKIDGINPNLDR	-	Rira_VGS_C1891	S1 protease 28	S1 protease
		-	-	-	-	-	-		653.34	2	LWVFNSPEGTR	-	Rira_VGS_C1891	S1 protease 28
		-	-	-	-	-	-		659.38	2	Q*TVHDVLLKPGK	Q - pyroglutamination	Rira_VGS_C1891	S1 protease 28
		-	-	-	-	-	-		788.39	3	CTAVSLGDPEPEEIVELHPNR	-	Rira_VGS_C1891	S1 protease 28
		-	-	-	-	-	-		1001.46	2	SYEIISPNYPNAM*DWGK	-	Rira_VGS_C1891	S1 protease 28
		721.37	2	CIATALSSPAPPEK	-	Rira_VGS_C433	S1 protease 40	S1 Protease	721.37	2	CIATALSSPAPPEK	-	Rira_VGS_C433	S1 protease 40
		517.24	3	IDHQYVTAM*GWGR	M - oxidation	Rira_VGS_C433	S1 protease 40		711.34	2	LGEDEYDIKDPK	-	Rira_VGS_C433	S1 protease 40
		-	-	-	-	-	-		815.43	2	TGLLVGSGYLFCSVR	-	Rira_VGS_C433	S1 protease 40
		549.32	2	NVISLGELPR	-	Rira_VGS_C433	S1 protease 40	S1 Protease	549.32	2	NVISLGELPR	-	Rira_VGS_C433	S1 protease 40
		-	-	-	-	-	-		546.28	2	IQLNEFGDR	-	Rira_VGS_C1028	S1 protease CUB domain 4	S1 protease CUB domain
		538.31	2	Q*VVHNVQIR	-	Rira_VGS_C1028	S1 protease CUB domain 4	S1 Protease CUB Domain	538.31	2	Q*VVHNVQIR	-	Rira_VGS_C1028	S1 protease CUB domain 4
		489.75	2	SGEPYANIK	-	Rira_VGS_C1028	S1 protease CUB domain 4		489.75	2	SGEPYANIK	-	Rira_VGS_C1028	S1 protease CUB domain 4
		-	-	-	-	-	-		653.34	2	LWVFNSPEGTR	-	Rira_VGS_C1590	S1 protease 28	S1 protease
		-	-	-	-	-	-		659.38	2	Q*TVHDVLLKPGK	Q - pyroglutamination	Rira_VGS_C1590	S1 protease 28
		-	-	-	-	-	-		1159.55	2	IDGNSPNLDSLWVFNSPEGTR	-	Rira_VGS_C1590	S1 protease 28
		-	-	-	-	-	-		690.31	2	TGNEITINAER	-	Rira_VGS_C6007	S1 protease 22
		-	-	-	-	-	-		720.87	2	GSNFEDIAVIFTK	-	Rira_VGS_C6007	S1 protease 22
		-	-	-	-	-	-		762.39	2	IVIMGWGLTENYQ	-	Rira_VGS_C6007	S1 protease 22
		-	-	-	-	-	-		565.28	2	IDGTNPELDR	-	Rira_VGS_C1890	S1 protease 42
		-	-	-	-	-	-		561.78	2	IQLDNYGSGR	-	Rira_VGS_C1890	S1 protease 42
		619.87	2	LINLIPQTGGGR	-	Rira_VGS_C68	S1 protease 2	S1 Protease	721.9	2	LFYQAAVVSFGLK	-	Rira_VGS_C1645	S1 protease
	20	524.26	2	FQTGPTPSGR	-	Rira_VGS_C4742	S1 protease CUB domain 19	S1 Protease CUB Domain	-	-	-	-	-	-
		771.37	2	TQVETHDVQLEDK	-	Rira_VGS_C4742	S1 protease CUB domain 19		-	-	-	-	-	-
		727.3	2	VDDGTGM*QELCGR	M - oxidation	Rira_VGS_C4742	S1 protease CUB domain 19		-	-	-	-	-	-
		683.35	2	VENVAITAEEYK	-	Rira_VGS_C4742	S1 protease CUB domain 19		-	-	-	-	-	-
		726.38	2	FSTEPNQQIIFK	-	Rira_VGS_C4742	S1 protease CUB domain 19		-	-	-	-	-	-
		816.91	2	Q*RVENVAITAEEYK	Q - pyroglutamination	Rira_VGS_C4742	S1 protease CUB domain 19		-	-	-	-	-	-
		656.82	2	VETHDVQLEDK	-	Rira_VGS_C4742	S1 protease CUB domain 19		-	-	-	-	-	-
		800.91	2	AIESPAYPDIPAAGTK	-	Rira_VGS_C16	S1 protease CUB domain 3	S1 protease CUB domain	-	-	-	-	-	-
		594.29	2	GYFLVFDGNR	-	Rira_VGS_C16	S1 protease CUB domain 3		594.29	2	GYFLVFDGNR	-	Rira_VGS_C16	S1 protease CUB domain 3	S1 protease CUB domain
		518.77	2	LELGGAAYDK	-	Rira_VGS_C16	S1 protease CUB domain 3		-	-	-	-	-	-
		720.83	2	M*TWNFVTSPDAR	M - oxidation	Rira_VGS_C16	S1 protease CUB domain 3		-	-	-	-	-	-
		526.73	2	SFDTTNPDR	-	Rira_VGS_C16	S1 protease CUB domain 3		526.73	2	SFDTTNPDR	-	Rira_VGS_C16	S1 protease CUB domain 3	S1 protease CUB domain
		1019.9	2	LT*WYLSS*EPGT*SMLLT	S/T - phosphorylation	Rira_VGS_C16	S1 protease CUB domain 3		-	-	-	-	-	-
		570.82	2	IGPICLTPNR	-	Rira_VGS_C1504	S1 protease CUB domain 2	S1 protease CUB domain	-	-	-	-	-	-
		737.83	2	Q*TYPSEQTCHKL	Q - pyroglutamination	Rira_VGS_C1504	S1 protease CUB domain 2		-	-	-	-	-	-
		566.79	2	VVDINVCDAK	-	Rira_VGS_C1504	S1 protease CUB domain 2		-	-	-	-	-	-
		475.77	2	YQSAILQK	-	Rira_VGS_C1504	S1 protease CUB domain 2		-	-	-	-	-	-
		779.86	2	YSFSLINDGDYHK	-	Rira_VGS_C1504	S1 protease CUB domain 2		-	-	-	-	-	-
		681.29	2	Q*TYPSEQTCHKL	Q - pyroglutamination	Rira_VGS_C1504	S1 protease CUB domain 2		-	-	-	-	-	-
		619.87	2	LINLIPQTGGGR	-	Rira_VGS_C68	S1 protease 2	S1 protease	-	-	-	-	-	-
		549.78	2	FDLYAPTGSK	-	Rira_VGS_C68	S1 protease 2		-	-	-	-	-	-
		542.28	2	Q*KVDVPSDGR	Q - pyroglutamination	Rira_VGS_C68	S1 protease 2		-	-	-	-	-	-
		641.33	2	TIYSIDTNNLK	-	Rira_VGS_C68	S1 protease 2		-	-	-	-	-	-
		422.71	2	VDVPSDGR	-	Rira_VGS_C68	S1 protease 2		-	-	-	-	-	-
		624.3	2	ISNPQYPGDTR	-	Rira_VGS_C517	S1 protease	S1 protease	-	-	-	-	-	-
		675.32	2	TISN*PQYPGDTR	N - deamidation	Rira_VGS_C517	S1 protease		-	-	-	-	-	-
		798.86	2	QAM*IM*GWGVTEEGR	M - oxidation	Rira_VGS_C517	S1 protease		-	-	-	-	-	-
		862.9	2	TFCSGDSGGPVVWLDK	-	Rira_VGS_C517	S1 protease		-	-	-	-	-	-
		525.8	2	FSQISIISR	-	Rira_VGS_C546	S1 protease		-	-	-	-	-	-
		630.76	2	M*SFQCDTSLR	M - oxidation	Rira_VGS_C546	S1 protease		-	-	-	-	-	-
		777.88	2	AIIM*GWGLTEEYR	M - oxidation	Rira_VGS_C546	S1 protease		-	-	-	-	-	-
		518.79	2	YAQLSLVSR	-	Rira_VGS_C622	S1 protease		-	-	-	-	-	-
		675.32	2	TISNPEYPGDTR	-	Rira_VGS_C622	S1 protease		-	-	-	-	-	-
		723.39	2	EVTVNAENVFVPK	-	Rira_VGS_C622	S1 protease		-	-	-	-	-	-
		529.75	2	FCIGYVDGK	-	Rira_VGS_C160	redulysin 4a	Redulysin	-	-	-	-	-	-
		692.37	2	VIGPVCLQGVEGR	-	Rira_VGS_C160	redulysin 4a		-	-	-	-	-	-
		549.32	2	NVISLGELPR	-	Rira_VGS_C433	S1 protease 40	S1 protease	-	-	-	-	-	-
		510.76	2	LM*VSAGDSPK	M - oxidation	Rira_VGS_C433	S1 protease 40		-	-	-	-	-	-
		518.79	2	YAQLSLVSR	-	Rira_VGS_C1629	S1 protease	S1 protease	673.86	2	LWLFESPEGIR	-	Rira_VGS_C1629	S1 protease	S1 protease
		492.8	2	NLGRIINGK	-	Rira_VGS_C1629	S1 protease		-	-	-	-	-	-
		556.31	2	NTYVIFGIGK	-	Rira_VGS_C297	redulysin 8	Redulysin	-	-	-	-	-	-
