# Supplementary material for: Hexapod Assassins’ Potion: Venom Composition and Bioactivity from the Eurasian Assassin Bug Rhynocoris iracundus
Source: Biomedicines. 2021 Jul 14;9(7):819. doi: 10.3390/biomedicines9070819 (PMC8301361; doi:10.3390/biomedicines9070819)
Supplement: Supplementary file 1 [file biomedicines-09-00819-s001.zip › Supplementary Table S2 - Chitinase active domain information.xlsx]

## Sheet: Supp. Table S2
	Active domain 2
	NGLDVDWE (NxxDxDxx)			NGLDIDWE (NxxDxDxx)			DGLDVDWE (DxxDxDxx)
	Accession number	Species	Order	Accession number	Species	Order	Accession number	Species	Order
	Rira_VG-S_C2119	Rhynocoris iracundus (assassin bug)	Hemiptera	VVC92819.1	Leptidea sinapis	Lepidoptera	XP_020280473.1	Pseudomyrmex gracilis	Hymenoptera
	ATU82720.1	Pristhesancus plagipennis (assassin bug)	Hemiptera	XP_022127593.1	Pieris rapae (cabbage white)	Lepidoptera	KYN35631.1	Trachymyrmex septentrionalis	Hymenoptera
	XP_014294774.1	Halyomorpha halys (brown marmorated stink bug)	Hemiptera	ASM94207.1	Conogethes punctiferalis	Lepidoptera	XP_015187495.1	Polistes dominula (European paper wasp)	Hymenoptera
	XP_014243752.1	Cimex lectularius (bed bug)	Hemiptera	XP_032524956.1	Danaus plexippus plexippus	Lepidoptera	XP_018375648.1	Trachymyrmex cornetzi	Hymenoptera
	KAE9425519.1	Apolygus lucorum	Hemiptera	XP_034830363.1	Aphantopus hyperantus (ringlet)	Lepidoptera	XP_011337314.1	Ooceraea biroi (clonal raider ant)	Hymenoptera
	ANC95003.1	Lygus hesperus (lygus bug)	Hemiptera	XP_023941208.1	Bicyclus anynana (squinting bush brown)	Lepidoptera	XP_014613571.1	Polistes canadensis	Hymenoptera
	XP_018905689.1	Bemisia tabaci (silverleaf whitefly)	Hemiptera	AJO25042.1	Nilaparvata lugens (brown planthopper)	Hemiptera	XP_025986400.1	Solenopsis invicta (red fire ant)	Hymenoptera
	XP_022178760.1	Myzus persicae (green peach aphid)	Hemiptera	ARE59262.1	Sogatella furcifera (white-backed planthopper)	Hemiptera	EGI61144.1	Acromyrmex echinatior (Panamanian leafcutter ant)	Hymenoptera
	KAE9534810.1	Aphis glycines (soybean aphid)	Hemiptera				XP_018347638.1	Trachymyrmex septentrionalis	Hymenoptera
	XP_025197694.1	Melanaphis sacchari	Hemiptera				XP_018056118.1	Atta colombica	Hymenoptera
	XP_015368516.1	Diuraphis noxia (Russian wheat aphid)	Hemiptera				XP_029041819.1	Osmia bicornis bicornis	Hymenoptera
	XP_001950380.1	Acyrthosiphon pisum (pea aphid)	Hemiptera				XP_032676222.1	Odontomachus brunneus	Hymenoptera
	XP_026809121.1	Rhopalosiphum maidis (corn leaf aphid)	Hemiptera				XP_033330548.1	Megalopta genalis	Hymenoptera
	XP_025407832.1	Sipha flava (yellow sugarcane aphid)	Hemiptera				XP_012060371.1	Atta cephalotes	Hymenoptera
	KAF0772257.1	Aphis craccivora (cowpea aphid)	Hemiptera				XP_011172834.1	Solenopsis invicta (red fire ant)	Hymenoptera
	XP_011553989.1	Plutella xylostella (diamondback moth)	Lepidoptera				XP_011699779.1	Wasmannia auropunctata (little fire ant)	Hymenoptera
	NP_001296036.1	Plutella xylostella (diamondback moth)	Lepidoptera				KYM76839.1	Atta colombica	Hymenoptera
	KPJ02577.1	Papilio xuthus (Asian swallowtail)	Lepidoptera				XP_034180453.1	Osmia lignaria (orchard mason bee)	Hymenoptera
	XP_026725378.1	Trichoplusia ni (cabbage looper)	Lepidoptera				XP_011061639.1	Acromyrmex echinatior (Panamanian leafcutter ant)	Hymenoptera
	QIJ96696.1	Glyphodes pyloalis	Lepidoptera				XP_024891112.1	Temnothorax curvispinosus	Hymenoptera
	XP_021203926.1	Bombyx mori (domestic silkworm)	Lepidoptera				EFN89634.1	Harpegnathos saltator (Jerdon's jumping ant)	Hymenoptera
	XP_022127593	Pieris rapae (cabbage white)	Lepidoptera				XP_011637146.1	Pogonomyrmex barbatus (red harvester ant)	Hymenoptera
	XP_021193483.1	Helicoverpa armigera (cotton bollworm)	Lepidoptera				XP_011257954.1	Camponotus floridanus (Florida carpenter ant)	Hymenoptera
	XP_030022210.1	Manduca sexta (tobacco hornworm)	Lepidoptera				KYQ56499.1	Trachymyrmex zeteki	Hymenoptera
	XP_013198912.1	Amyelois transitella	Lepidoptera				XP_011875217.1	Vollenhovia emeryi	Hymenoptera
	ASM94207.1	Conogethes punctiferalis	Lepidoptera				XP_018404338.1	Cyphomyrmex costatus	Hymenoptera
	XP_021193493.1	Helicoverpa armigera (cotton bollworm)	Lepidoptera				XP_011139540.1	Harpegnathos saltator (Jerdon's jumping ant)	Hymenoptera
	CAB3223612.1	Arctia plantaginis	Lepidoptera				XP_018302023.1	Trachymyrmex zeteki	Hymenoptera
	AFM38213.1	Spodoptera exigua (beet armyworm)	Lepidoptera				XP_012231461.1	Linepithema humile (Argentine ant)	Hymenoptera
	XP_022830574.1	Spodoptera litura	Lepidoptera				XP_016922880.1	Apis cerana (Asiatic honeybee)	Hymenoptera
	PCG66555.1	Heliothis virescens (tobacco budworm)	Lepidoptera				XP_015595408.1	Cephus cinctus (wheat stem sawfly)	Hymenoptera
	AUF40393.1	Mythimna separata (northern armyworm)	Lepidoptera				PBC32932.1	Apis cerana cerana	Hymenoptera
	AGX32025.1	Ostrinia furnacalis (Asian corn borer)	Lepidoptera				XP_003697529.1	Apis florea (little honeybee)	Hymenoptera
	RZB40987.1	Asbolus verrucosus	Coleoptera
	XP_025832277.1	Agrilus planipennis (emerald ash borer)	Coleoptera
	EFA05323.2	Tribolium castaneum (red flour beetle)	Coleoptera
	KAF2900081.1	Ignelater luminosus	Coleoptera
	KAF5282476.1	Abscondita terminalis	Coleoptera
	XP_031339205.1	Photinus pyralis (common eastern firefly)	Coleoptera
	XP_030745277.1	Sitophilus oryzae (rice weevil)	Coleoptera
	XP_026279360.1	Frankliniella occidentalis (western flower thrips)	Thysanoptera
	XP_034248270	Thrips palmi	Thysanoptera
	XP_023715595	Cryptotermes secundus	Dictyoptera
	XP_308858.4	Anopheles gambiae	Diptera
	XP_002425481.1	Pediculus humanus corporis (human body louse)	Phthiraptera
